# Supplementary material
Source: Copernicus journal article supplement (doi:10.5194/egusphere-2026-2148)
Supplement: Supplementary file 1 [file egusphere-2026-2148-supplement.pdf]

## Supporting Information for

# **The sensitivity of ground-level ozone to precursor emissions and source contributions in Southeast Asia**

Jie Hu<sup>1,2</sup>, David C. Wong<sup>3,4</sup>, Jiaying Li<sup>1,2</sup>, Tingting Fang<sup>1,5</sup>, Steve H.L. Yim<sup>1,2,5,6\*</sup>

<sup>1</sup>Centre for Climate Change and Environmental Health, Nanyang Technological University, Singapore 639798, Singapore

<sup>2</sup>Asian School of the Environment, Nanyang Technological University, Singapore 639798, Singapore

<sup>3</sup>US Environmental Protection Agency, Research Triangle Park, NC, 27711, USA

<sup>4</sup>Department of Earth and Atmospheric Sciences, University of Houston, Houston, TX, 77204, USA

<sup>5</sup>Earth Observatory of Singapore, Nanyang Technological University, Singapore 639798, Singapore

<sup>6</sup>Lee Kong Chian School of Medicine, Nanyang Technological University, Singapore 639798, Singapore

*Correspondence to:* Steve H. L. Yim (yimsteve@gmail.com)

## Supplementary Text S1

The WRF meteorological simulation was evaluated against the ECMWF Reanalysis v5 (ERA5) monthly mean dataset for the four monsoon seasons. The spatial patterns and quantitative comparisons of the seasonal variability of major meteorological variables are presented in Figs. S6-S9, including surface temperature, sea level pressure, and wind fields, which influenced O<sub>3</sub> formation and transport.

For surface temperature, the WRF simulation captured the main spatial variations across the modeling domain (Fig. S6). Statistical evaluation indicated strong agreement with ERA5, with a correlation coefficient of 0.86 and an IoA of 0.89 (Fig. S7a). The NMB between WRF and ERA5 was -4.2%, suggesting a slight regional-scale underestimation of surface temperature. For sea-level pressure, WRF showed high consistency with ERA5, yielding a correlation coefficient of 0.90 and an IoA of 0.94 (Fig. S8 and S7b), indicating that WRF reproduced sea-level pressure and associated circulation patterns over Southeast Asia. The WRF-simulated wind fields were also generally consistent with ERA5 in terms of both prevailing flow direction and wind speed (Fig. S9). Quantitatively, the wind evaluation showed a reasonably strong spatial correlation of 0.81 and an IoA of 0.88 (Fig. S7c and S7d), demonstrating that WRF captured the spatial variability of near-surface wind patterns. Overall, the meteorological evaluations showed good consistency between WRF and ERA5 across all monsoon seasons, indicating that WRF results reasonably represented the dominant monsoon-related characteristics over Southeast Asia and supported subsequent air quality modeling.

## Supplementary Figures

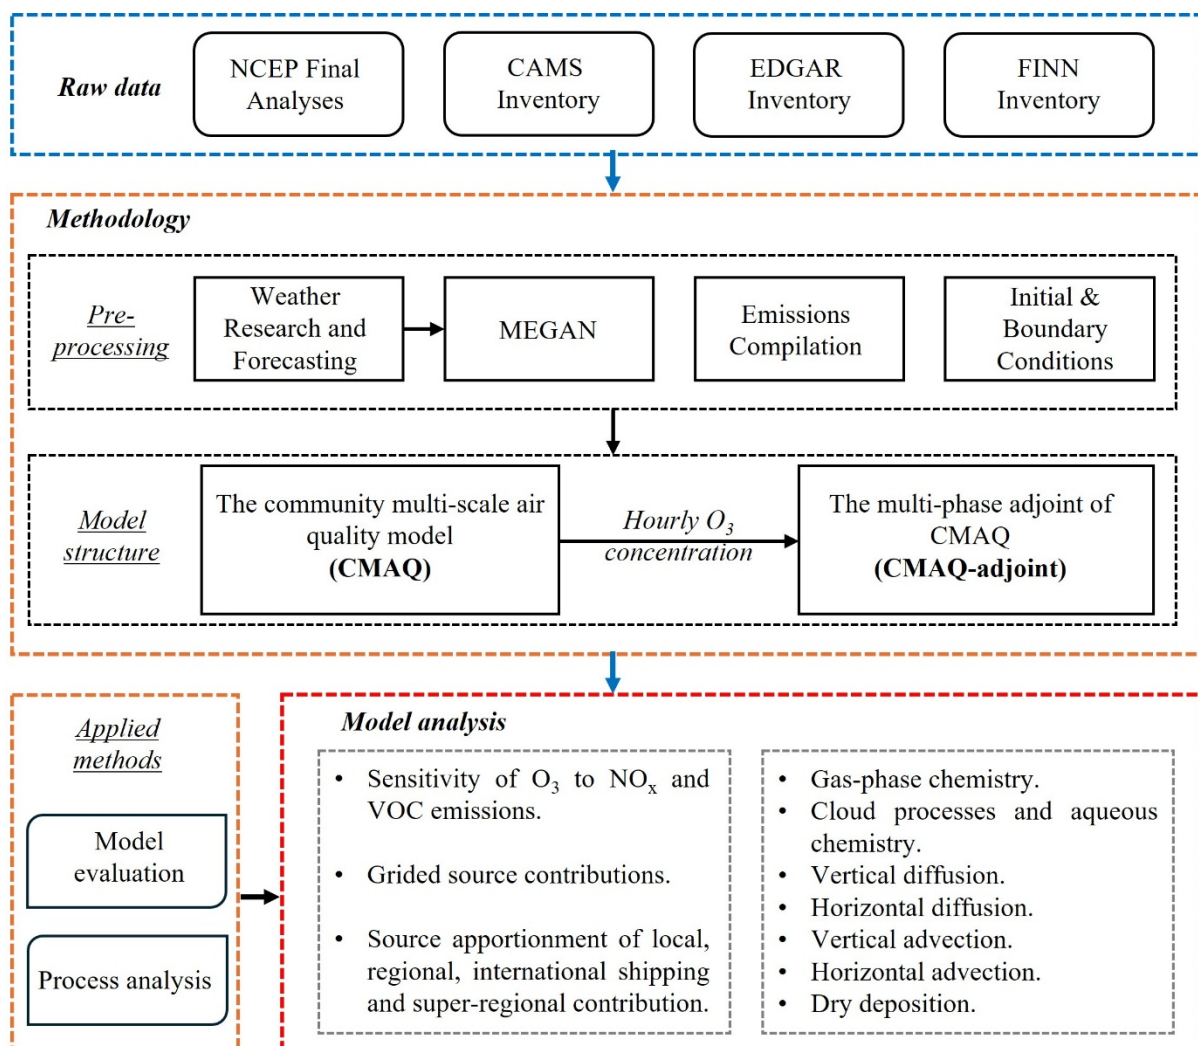

**Fig. S1.** The schematic flowchart of the study.

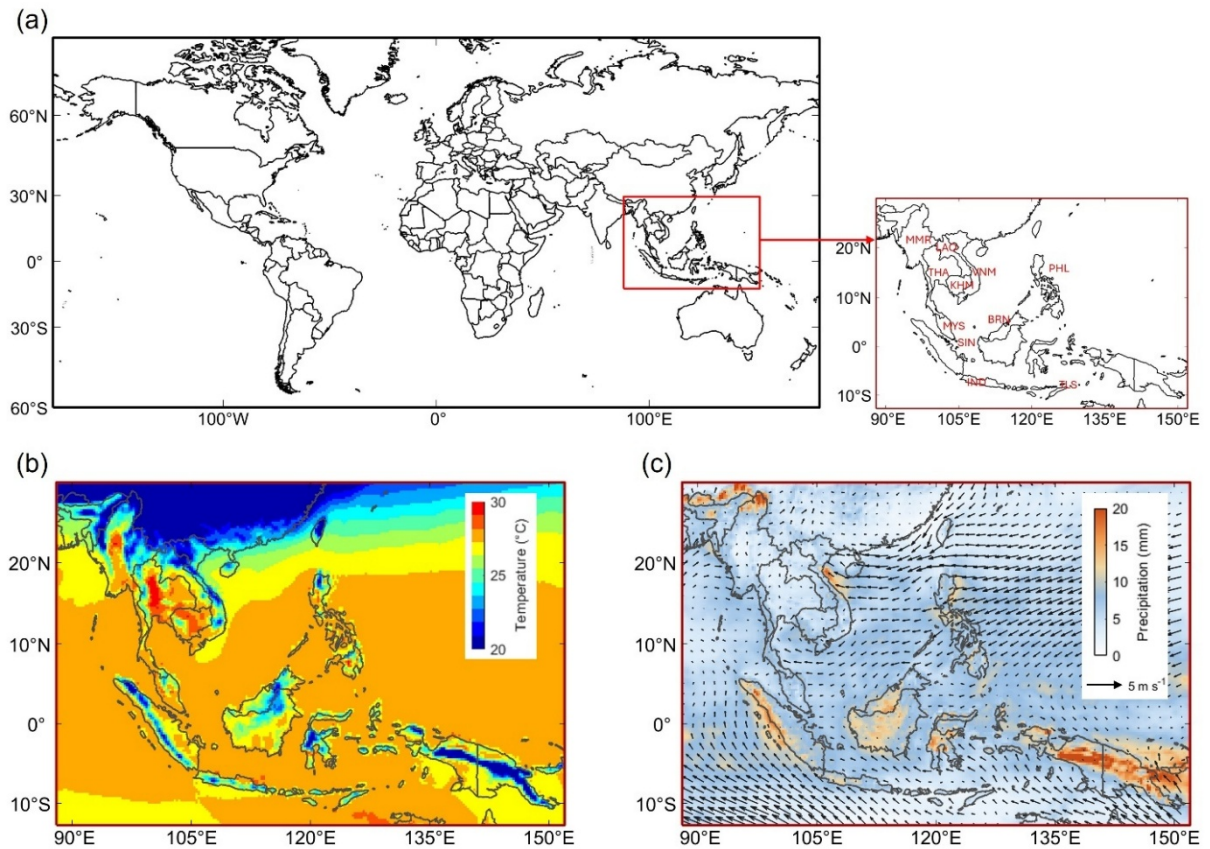

**Fig. S2.** Study domain and climatological characteristics of Southeast Asia. (a) The geographic location of the Southeast Asia study domain is highlighted on the global map, with country boundaries indicated. (b) Annual mean near-surface air temperature ( $^{\circ}\text{C}$ ) over Southeast Asia. (c) Annual accumulated precipitation (mm) and mean near-surface wind fields ( $\text{m s}^{-1}$ ) over Southeast Asia. SIN: Singapore, MYS: Malaysia, IDN: Indonesia, BRN: Brunei, PHL: Philippines, VNM: Vietnam, KHM: Cambodia, THA: Thailand, LAO: Laos, MMR: Myanmar, TLS: East Timor.

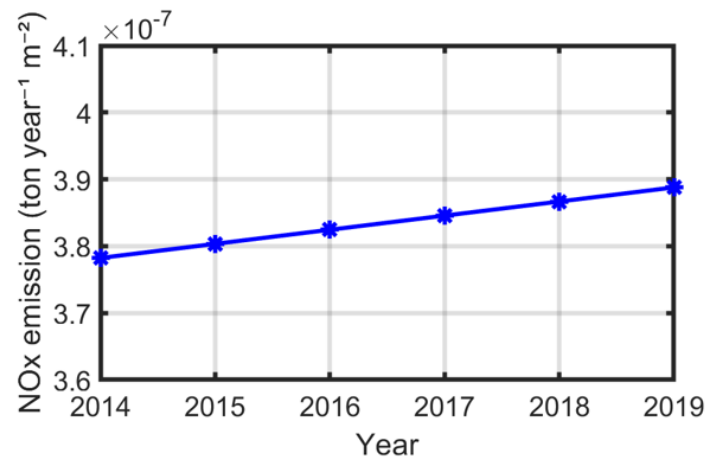

**Fig. S3.** The regional-mean NO<sub>x</sub> emissions in Southeast Asia during 2014-2023. The 2019 emissions exhibited only small interannual variability (within approximately 0.5% per year) during 2014-2019.

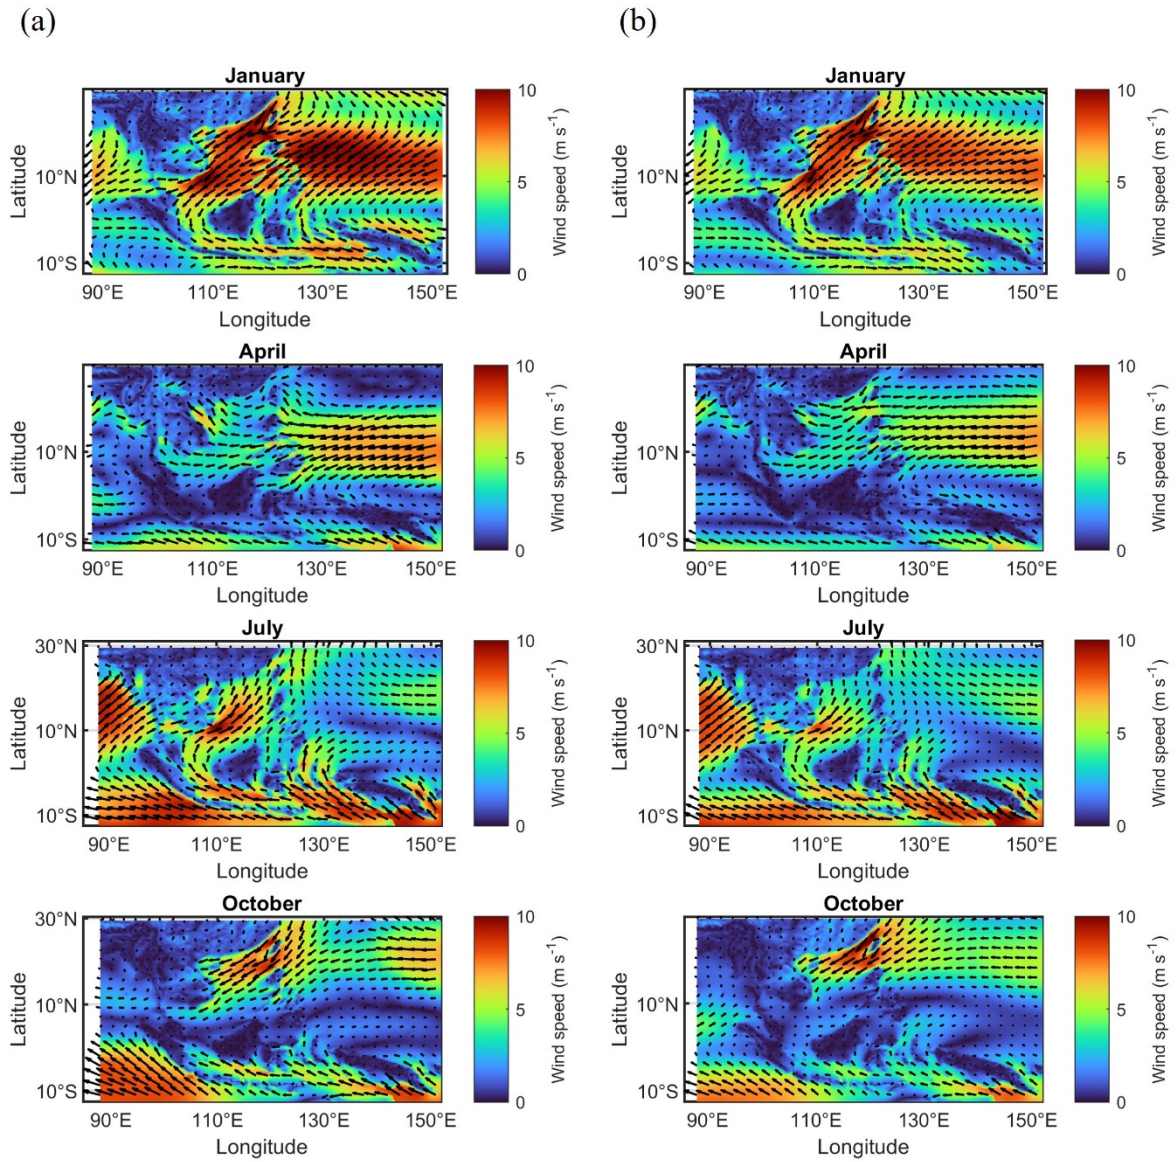

**Fig. S4.** The wind field in the four monsoon seasons in (a) 2019 and (b) 2014-2023 in Southeast Asia.

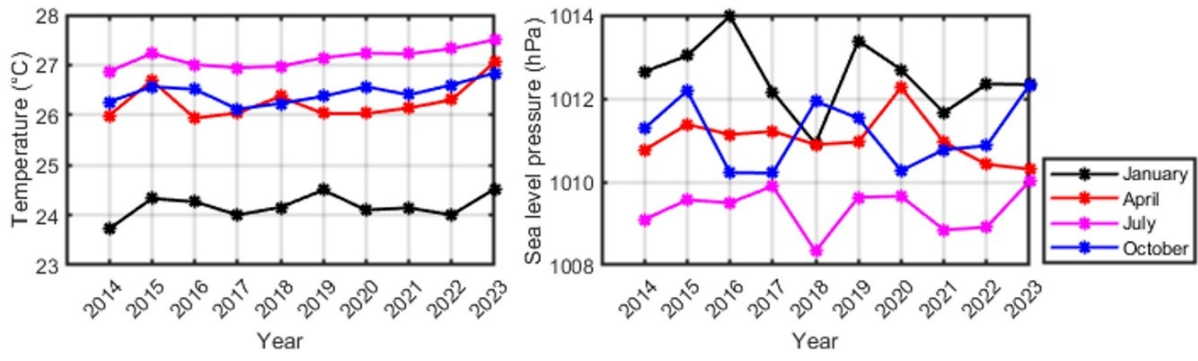

**Fig. S5.** The regional-mean surface temperature and sea level pressure in Southeast Asia during 2014-2023.

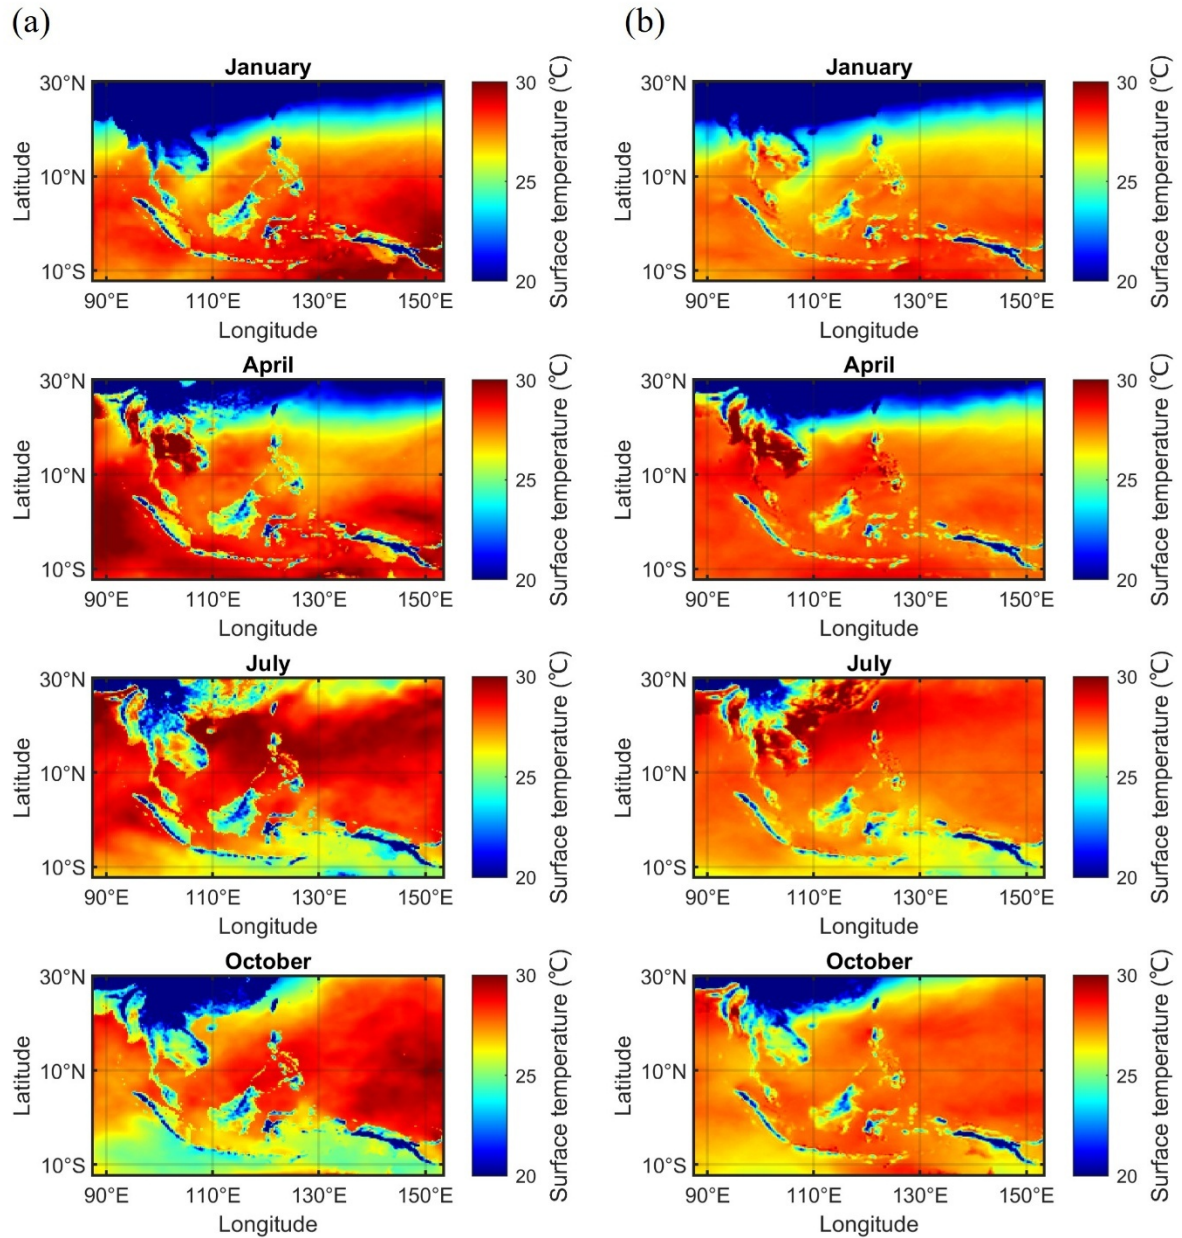

**Fig. S6.** Spatial comparison between the (a) simulated surface temperature and (b) the ERA5 reanalysis data in the four monsoon seasons in Southeast Asia.

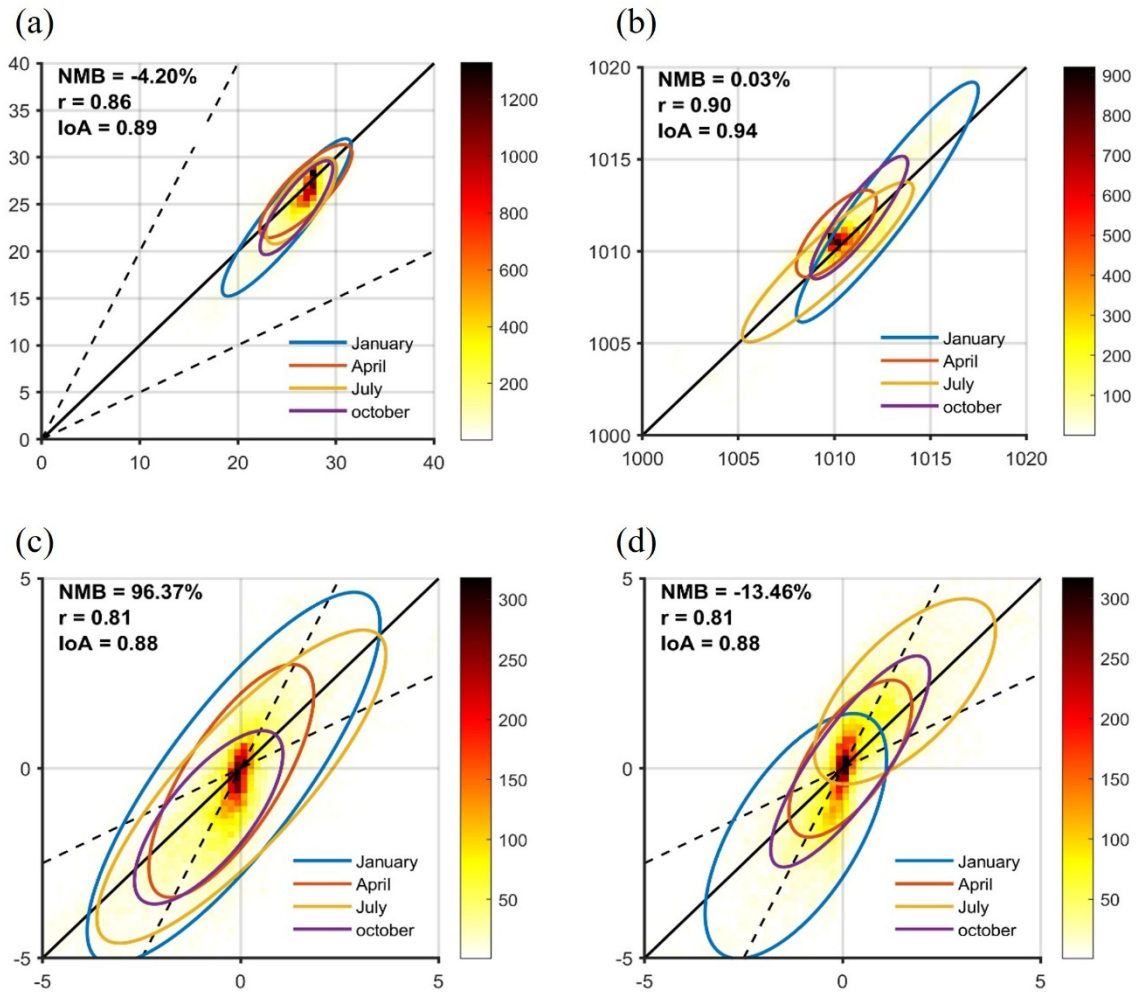

**Fig. S7.** Comparison between WRF simulation and the ERA5 reanalysis data for (a) surface temperature, (b) sea level pressure, (c) wind field horizontal direction, and (d) wind field vertical direction.

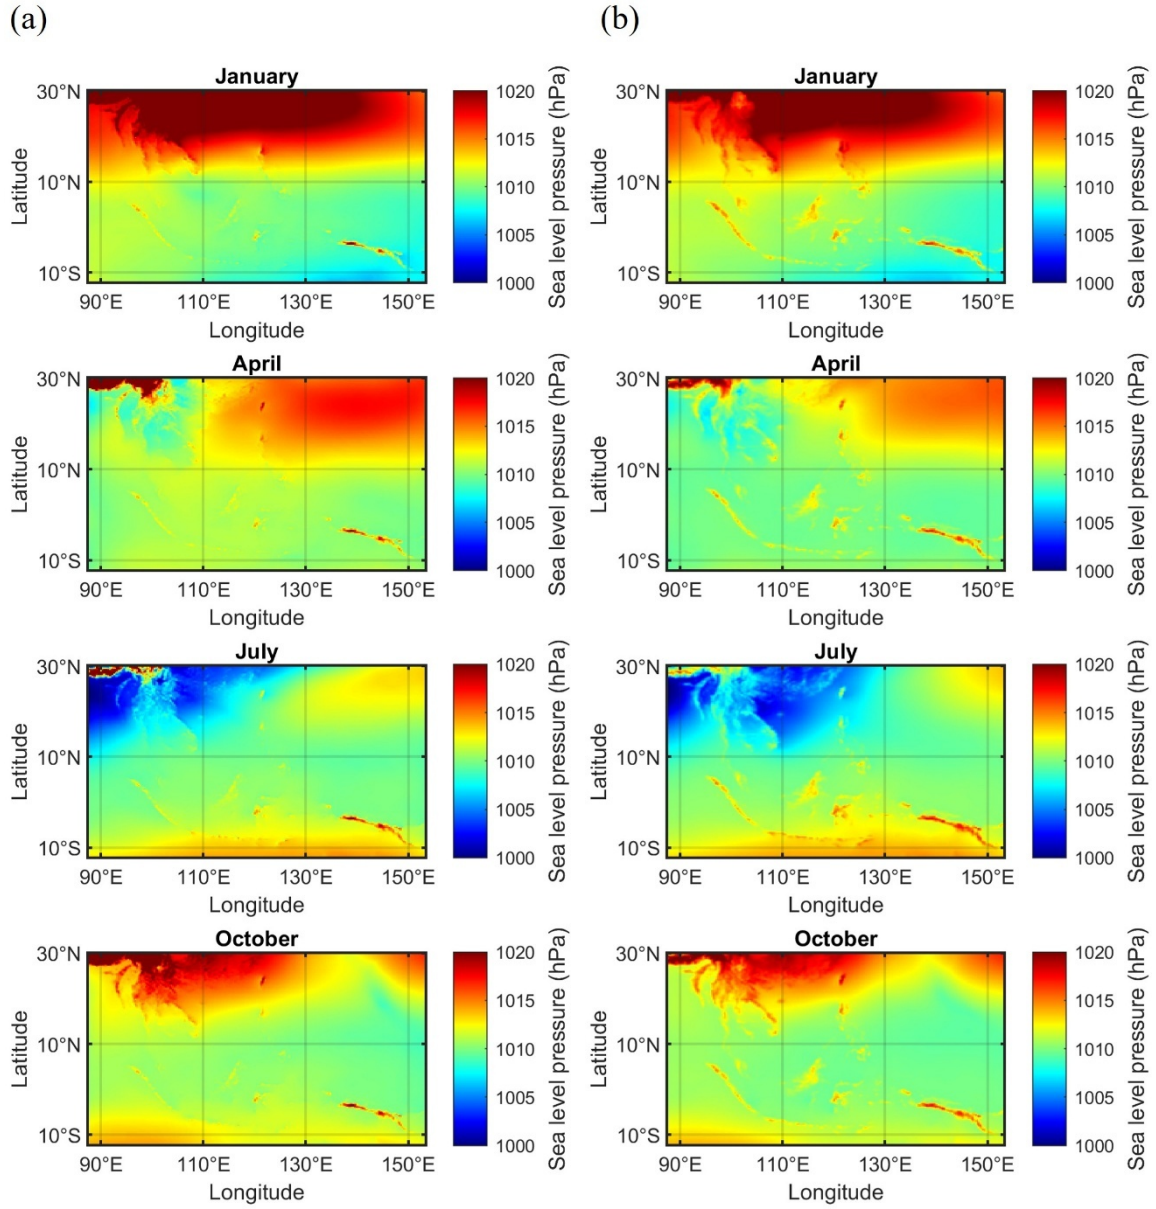

**Fig. S8.** Spatial comparison between the (a) simulated sea level pressure and the (b) ERA5 reanalysis data in the four monsoon seasons in Southeast Asia.

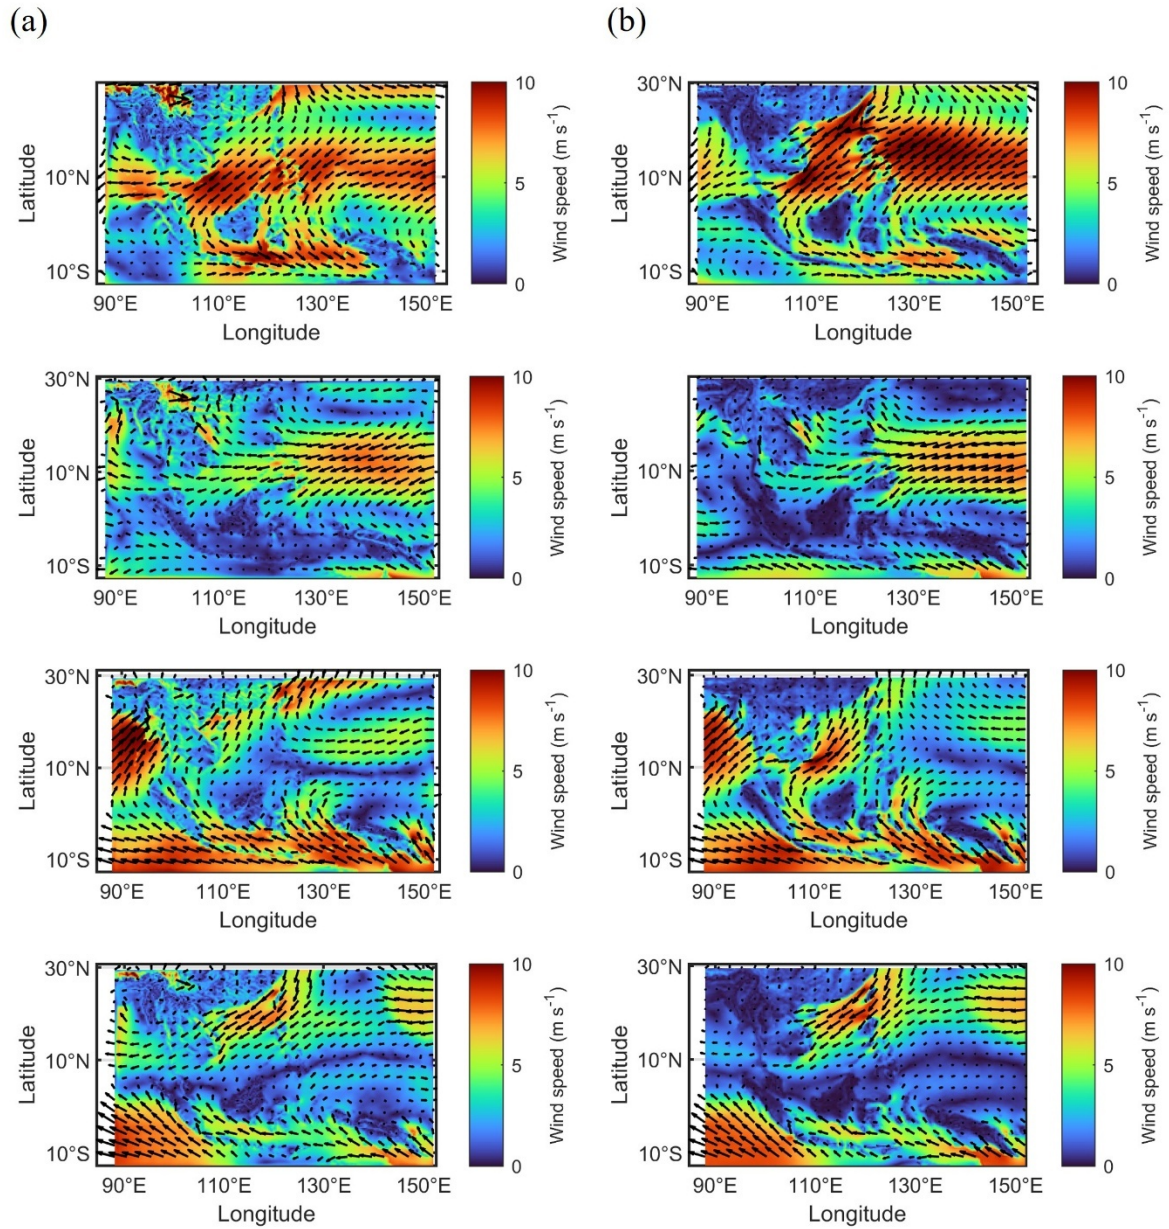

**Fig. S9.** Spatial comparison between the (a) simulated wind field and the (b) ERA5 reanalysis data in the four monsoon seasons in Southeast Asia.

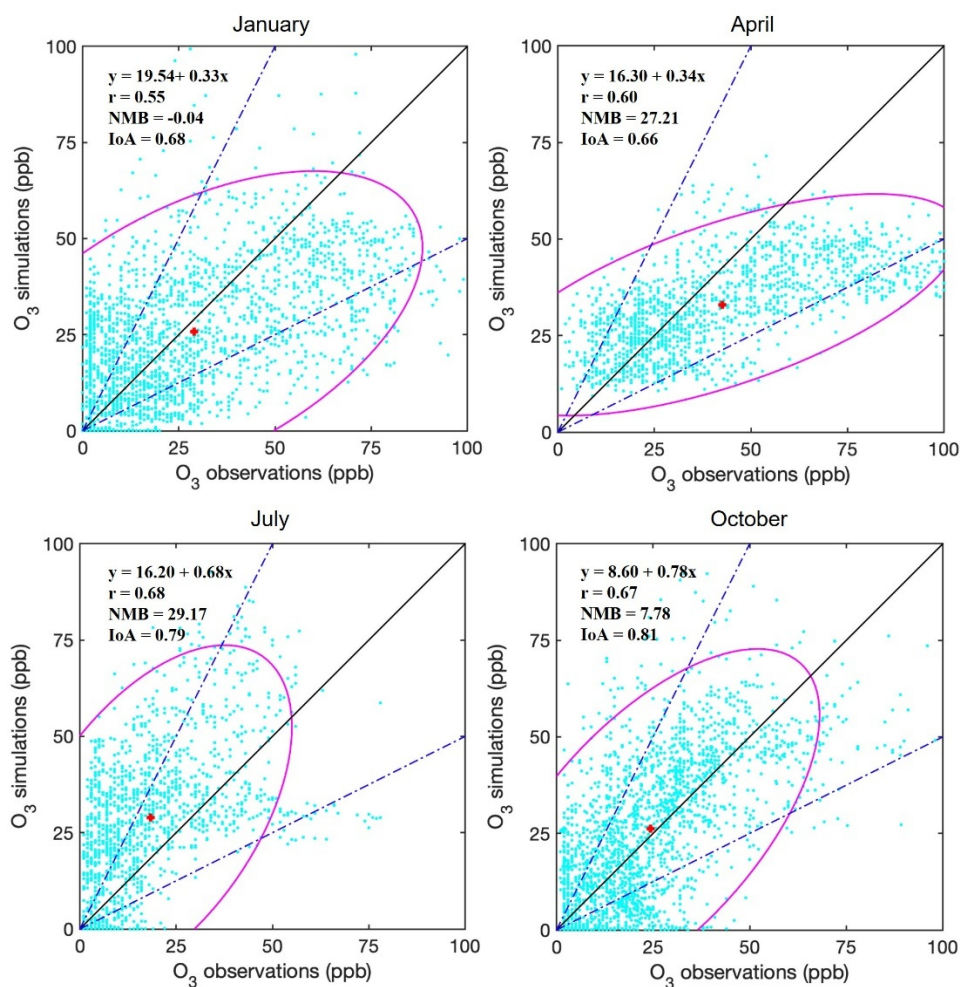

**Fig. S10.** CMAQ model evaluation by comparing the O<sub>3</sub> simulation with the observation data from monitoring stations. The ellipses represent the 95% confidence interval of the scatter points, and the centroid crosses show the median value. The statistical indicators (r, NMB (%), and IoA) were calculated using all the comparison data from available stations. The 1:1 line denotes the perfect predictions, and the 2:1 and 0.5:1 lines represent the  $\pm 50\%$  simulations, respectively.

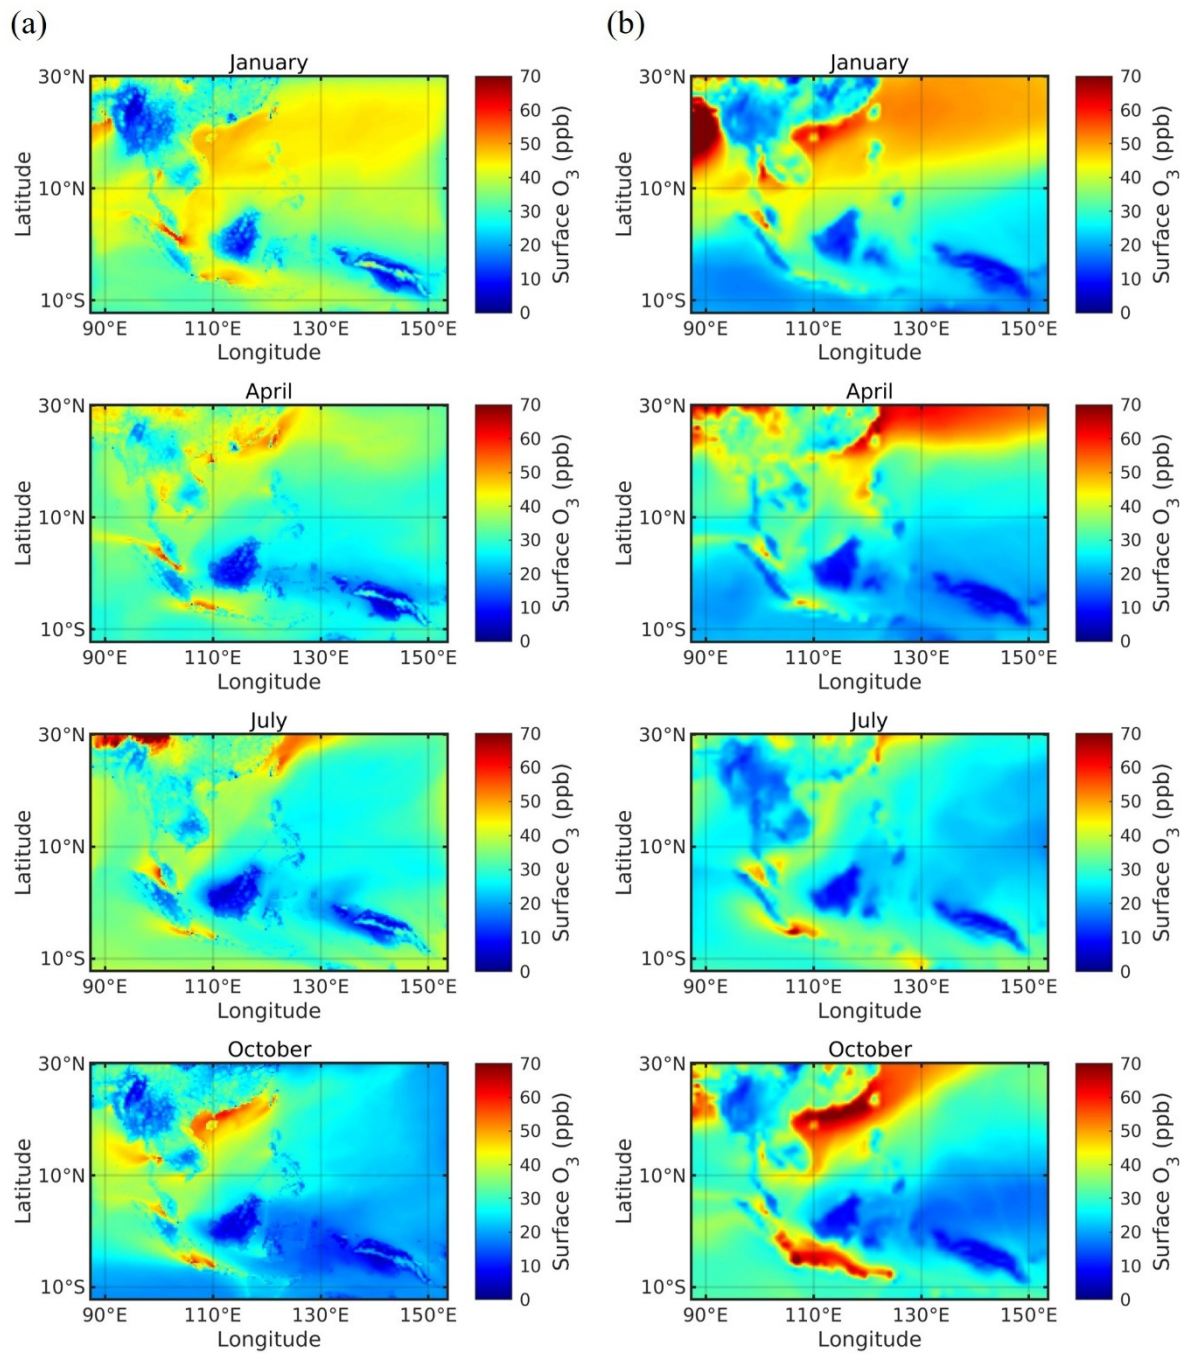

**Fig. S11.** Spatial comparison between CMAQ simulation and the CAMS EAC4 reanalysis data in the four monsoon seasons.

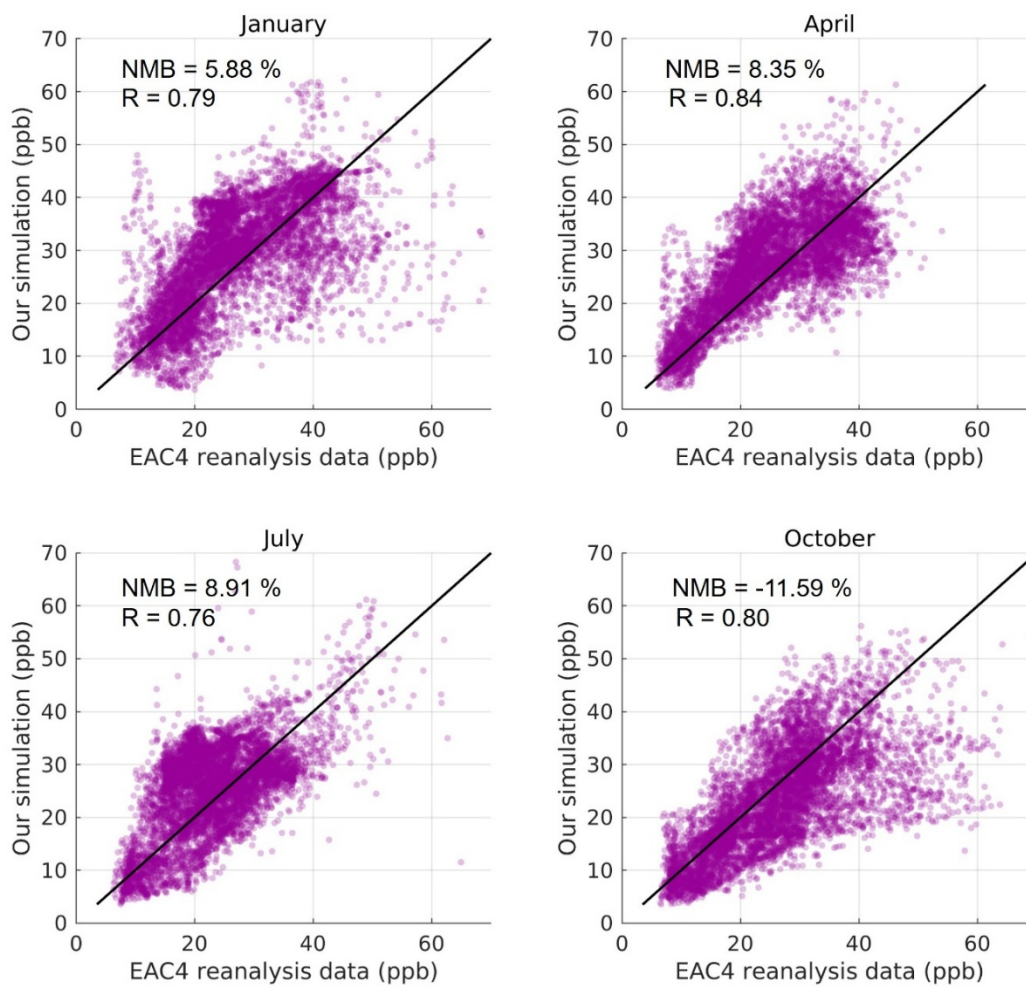

**Fig. S12.** Evaluation between the CMAQ simulation and the CAMS EAC4 reanalysis data in the four monsoon seasons.

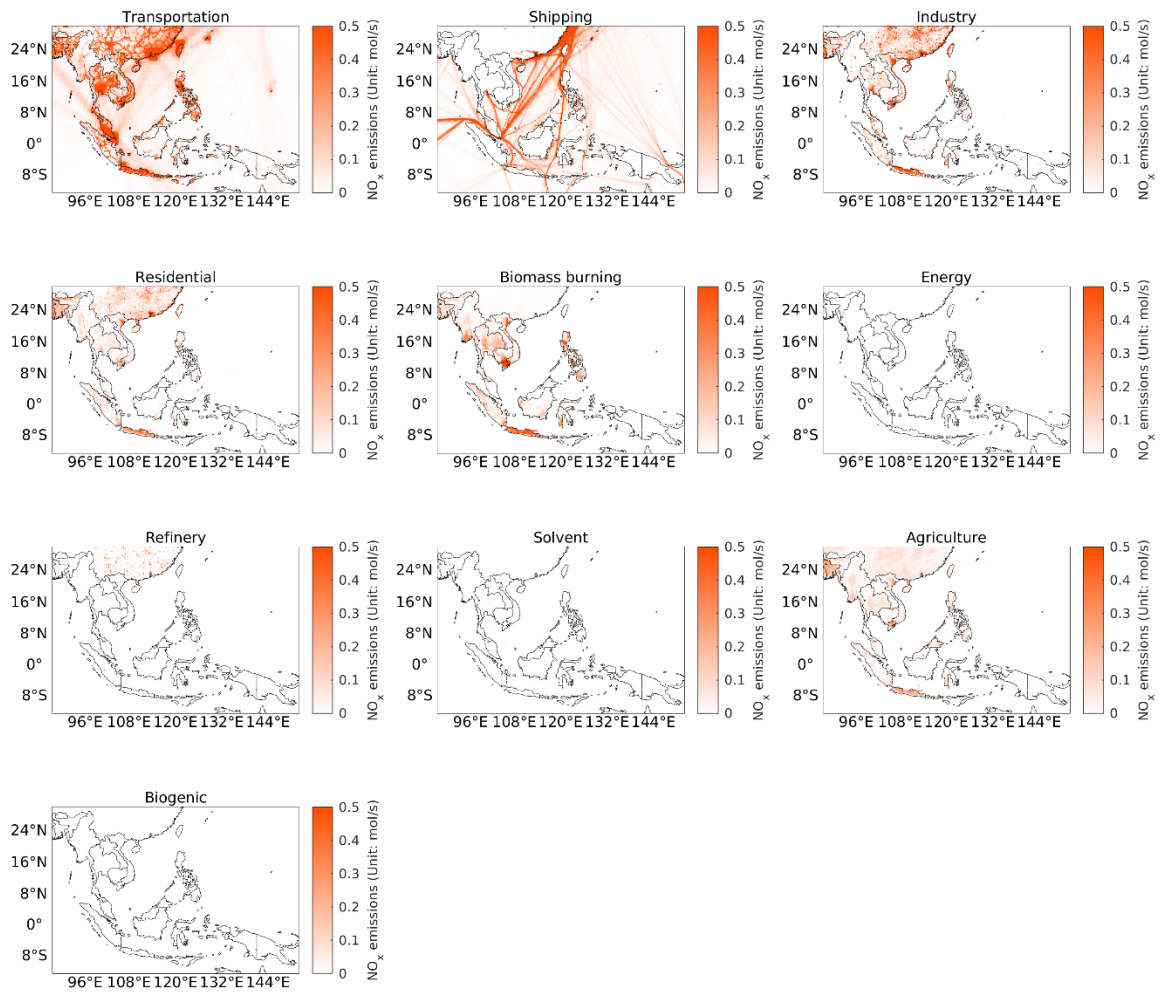

**Fig. S13.** Spatial distribution of NO<sub>x</sub> emissions from different sectors in Southeast Asia.

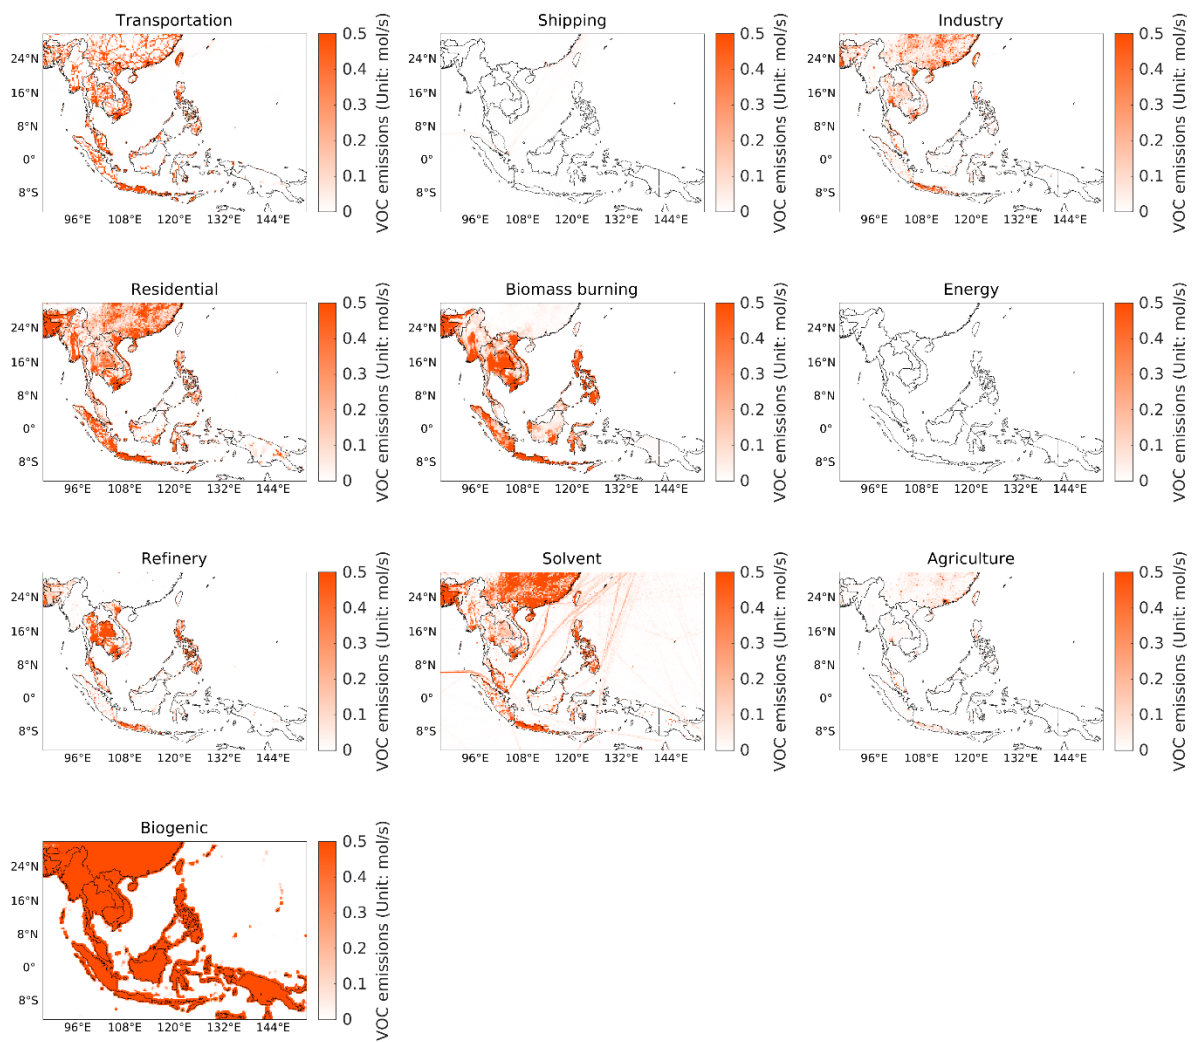

**Fig. S14.** Spatial distribution of VOC emissions from different sectors in Southeast Asia.

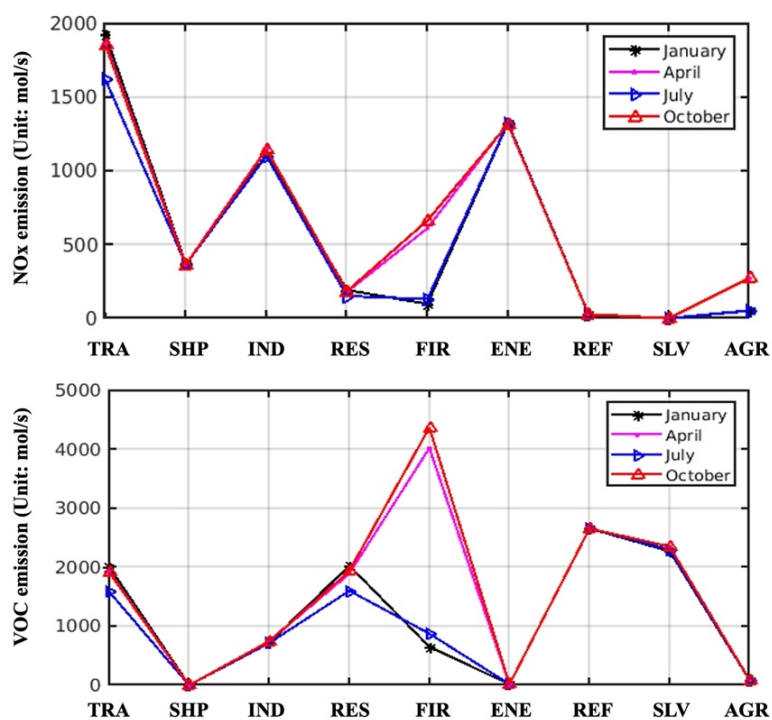

**Figure S15.** NO<sub>x</sub> and VOC emissions for Southeast Asia from nine different anthropogenic sectors during four monsoon seasons. TRA: transportation, SHP: shipping, IND: industrial processes, RES: residential, FIR: biomass burning (fire), ENE: power generation, REF: refineries, SLV: solvent and fugitives, AGR: agricultural sources.

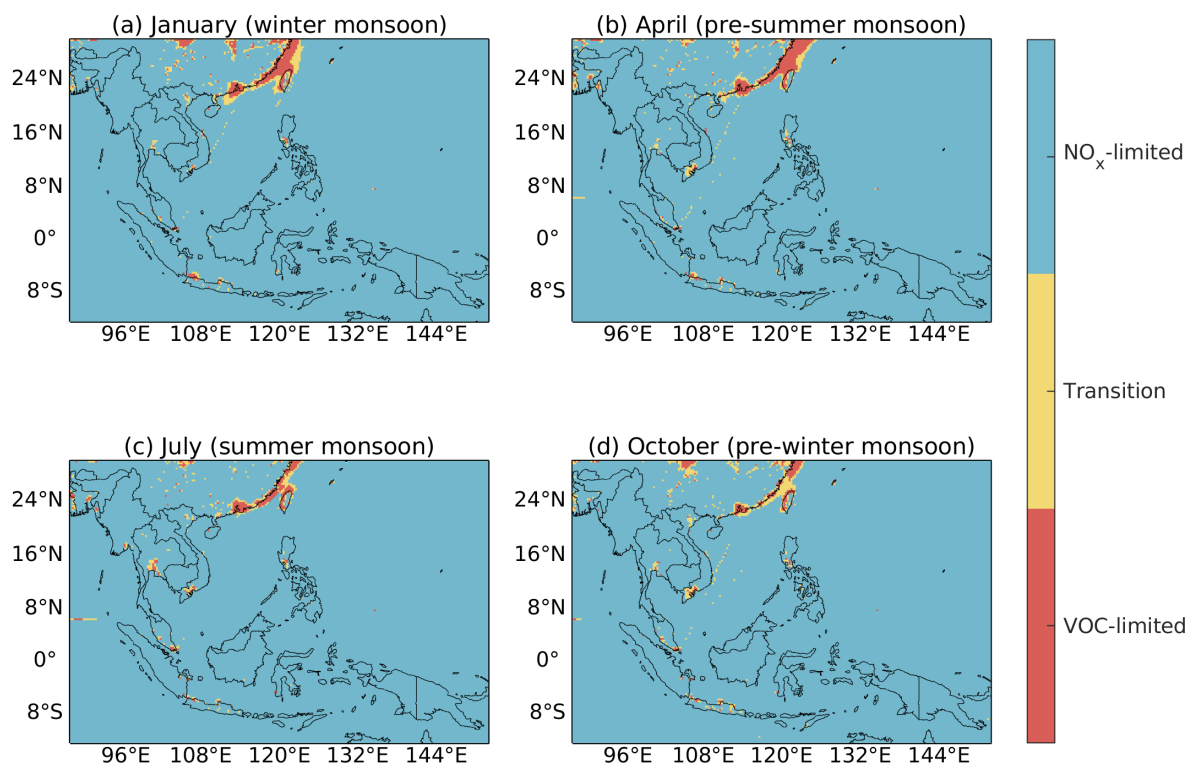

**Fig. S16.** Spatial distribution of the O<sub>3</sub> formation regimes over Southeast Asia during winter, pre-summer, summer, and pre-winter monsoon by the simulated ground-level CH<sub>2</sub>O/NO<sub>2</sub>. The VOC-limited regime (<0.4), the transition regime (0.4-0.7), and the NO<sub>x</sub>-limited regime (>0.7) are defined, according to (Jin et al., 2017).

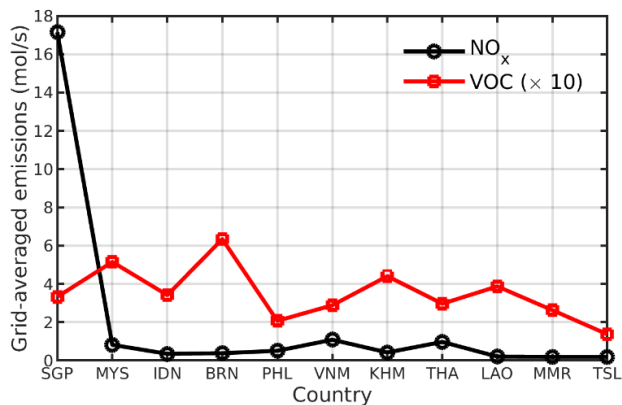

**Fig. S17.** Grid-averaged NO<sub>x</sub> and VOC emissions in the countries in Southeast Asia.

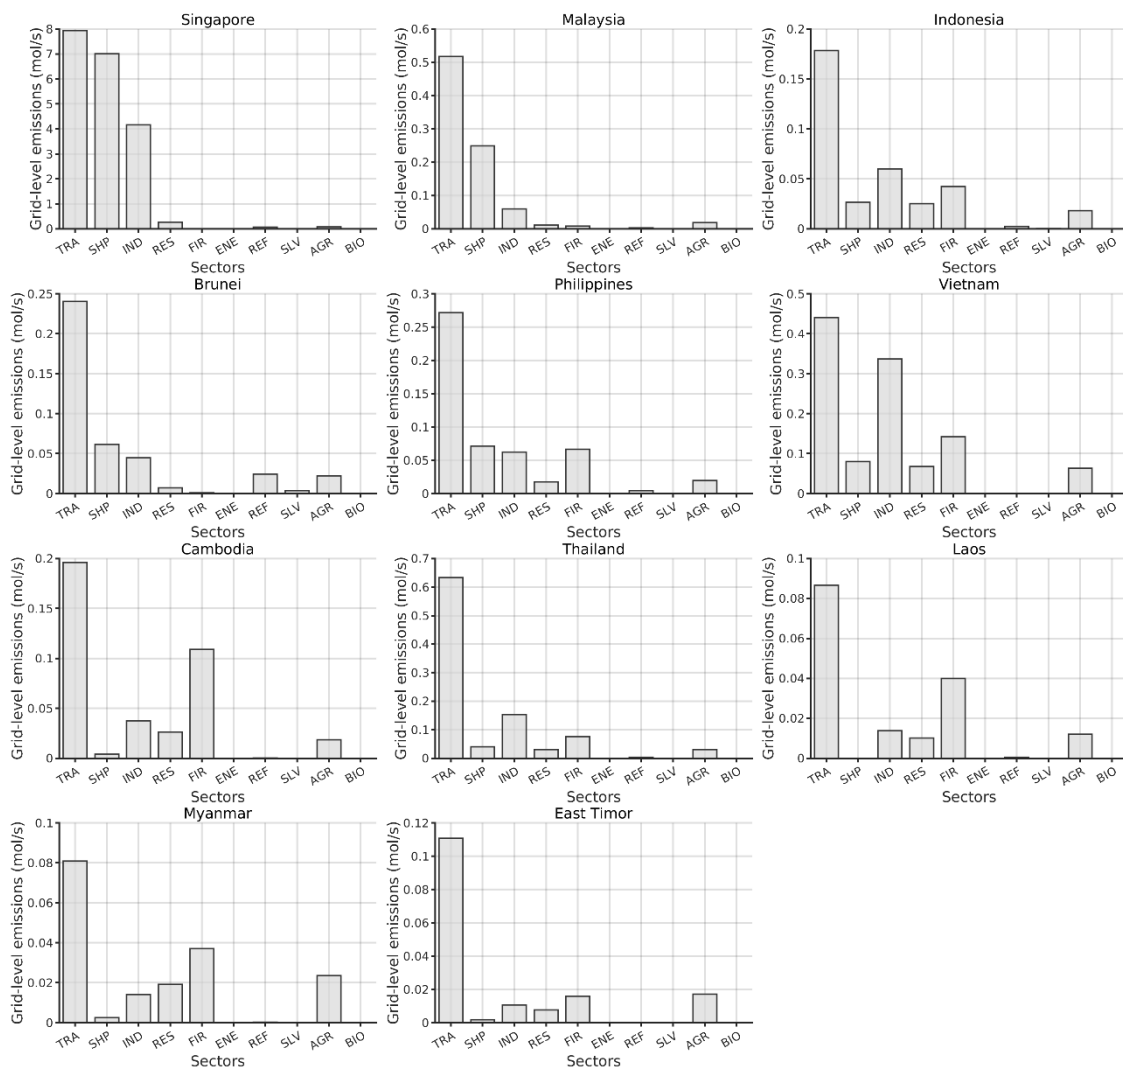

**Fig. S18.** Statistics of grid-level NO<sub>x</sub> emissions from different sectors in Southeast Asia. TRA: transportation, SHP: shipping, IND: industry, RES: residential, FIR: fire, ENE: energy, REF: refinery, SLV: solvent, AGR: agriculture, BIO: biogenic emissions.

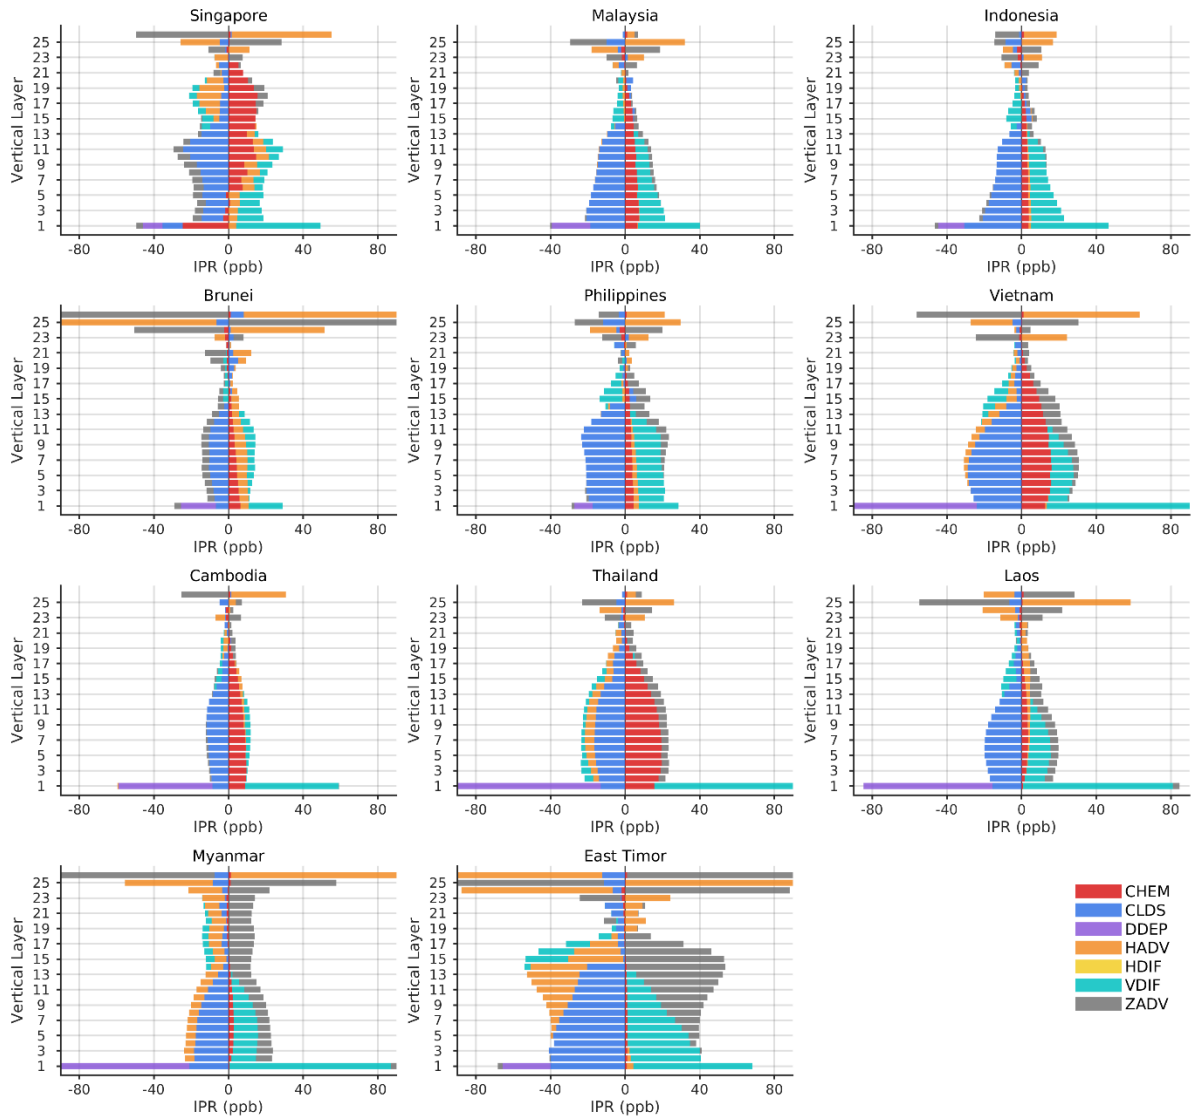

**Fig. S19.** The hourly averaged vertical distribution of the 26 layers from IPR analysis during the four monsoon seasons.

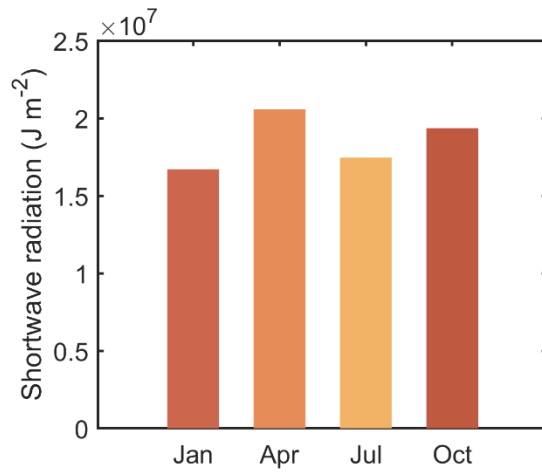

**Fig. S20.** Averaged short-wave radiation during the four monsoon seasons in 2019 in Southeast Asia.

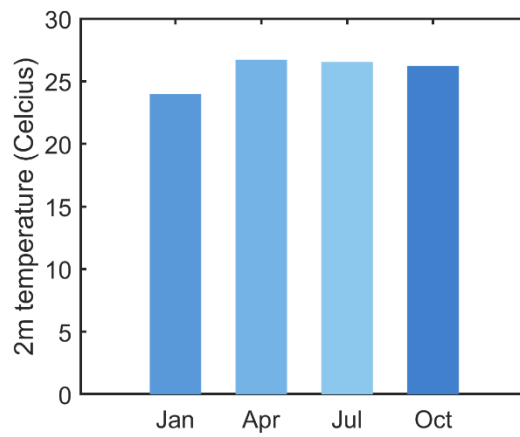

**Fig. S21.** Averaged 2m-temperature during the four monsoon seasons in 2019 in Southeast Asia.

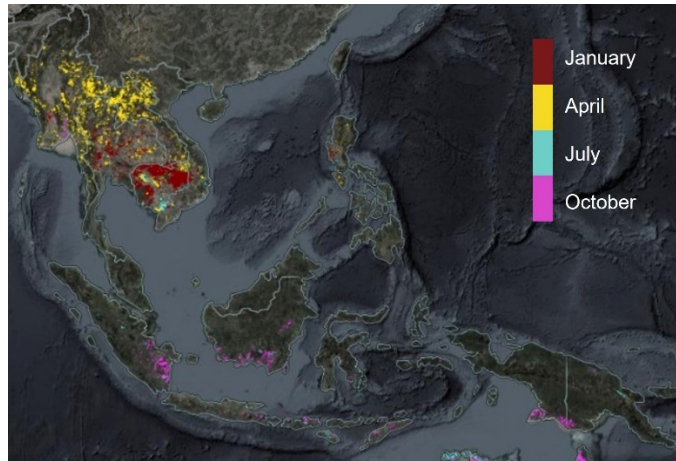

**Fig. S22.** MODIS burned areas in the four monsoon seasons in Southeast Asia in 2019. Downloaded from: <https://firms.modaps.eosdis.nasa.gov/>

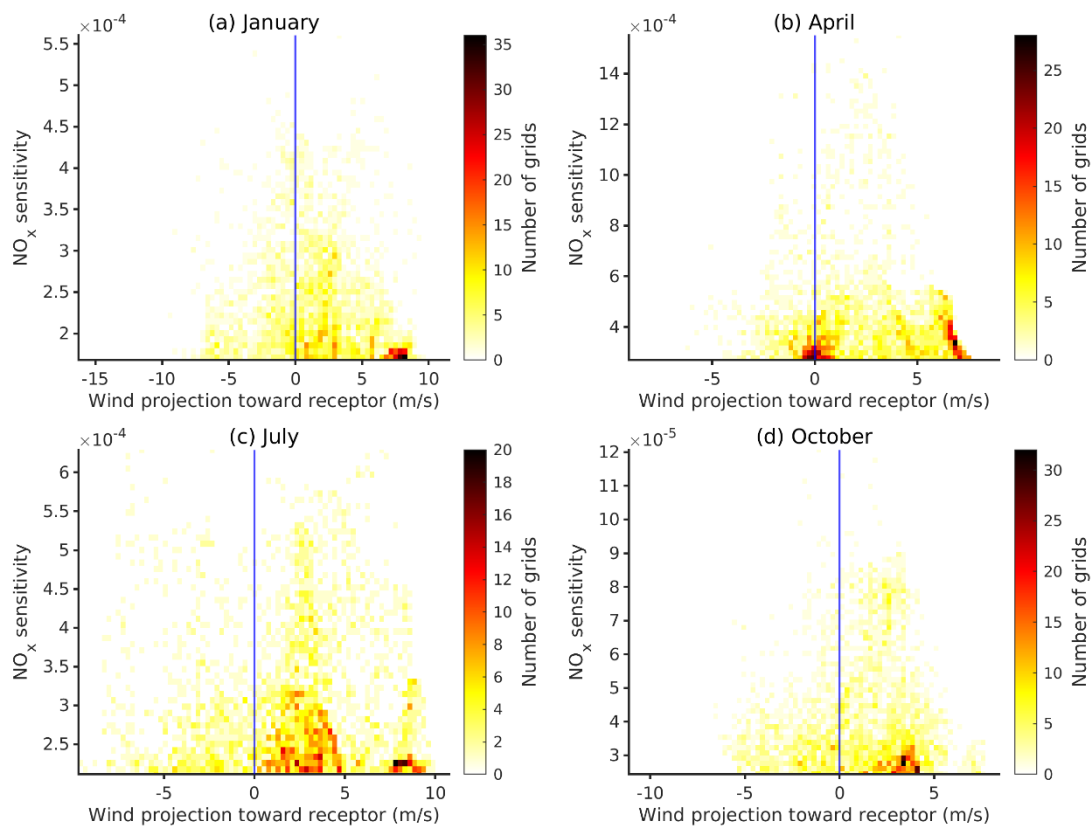

**Fig. S23.** Statistics of  $\text{NO}_x$  sensitivity signals in the upwind and downwind areas toward Southeast Asia.

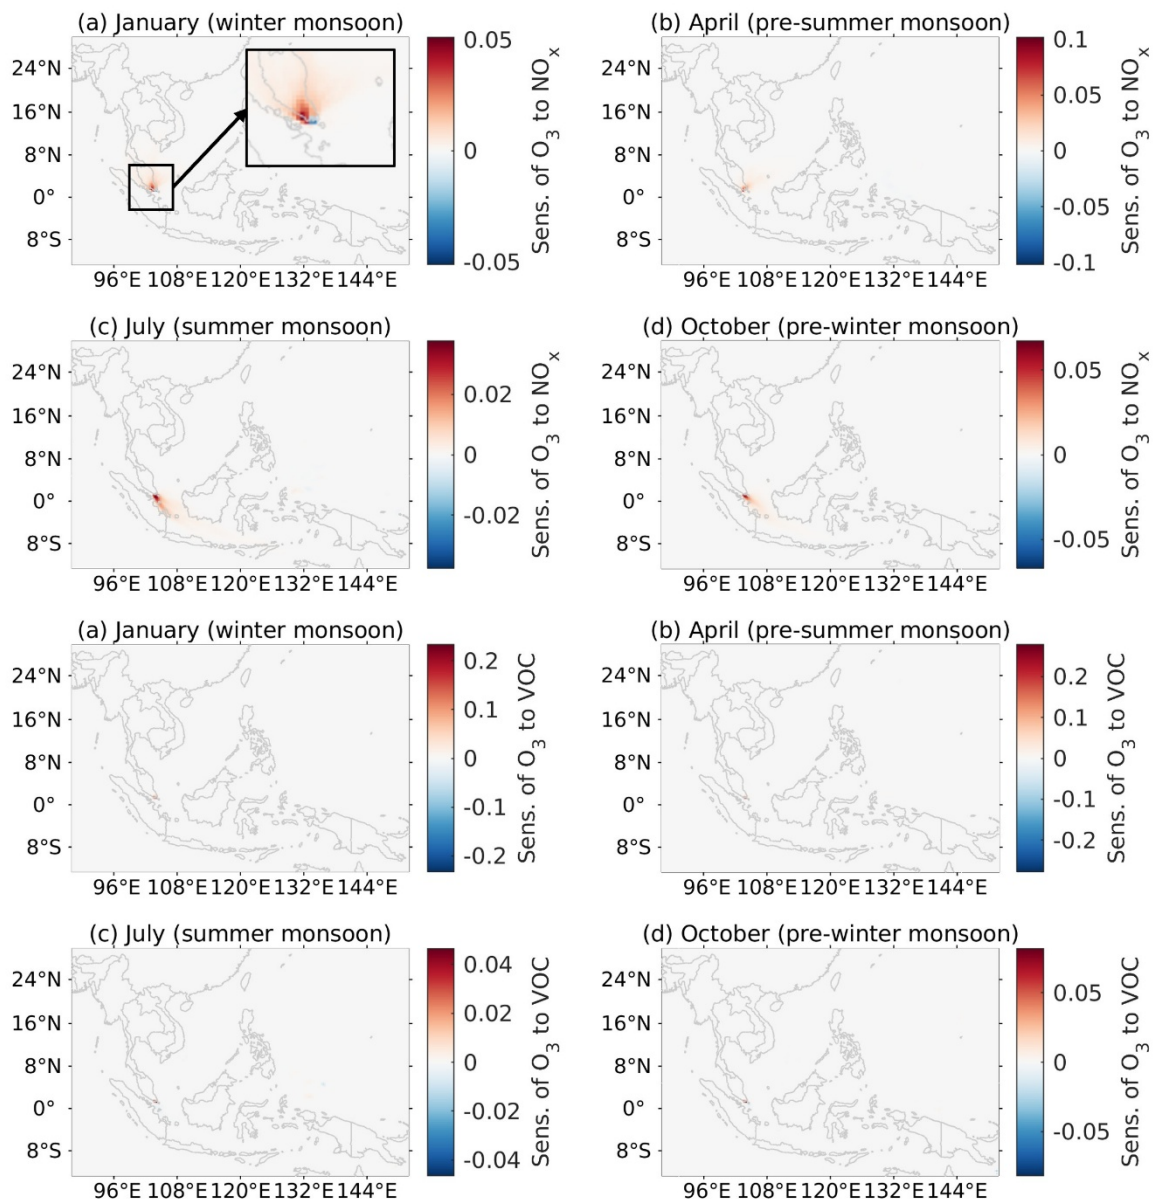

**Fig. S24.** Spatial distribution of the monthly mean sensitivity of O<sub>3</sub> in Singapore to NO<sub>x</sub> and VOC emissions during the four monsoon seasons.

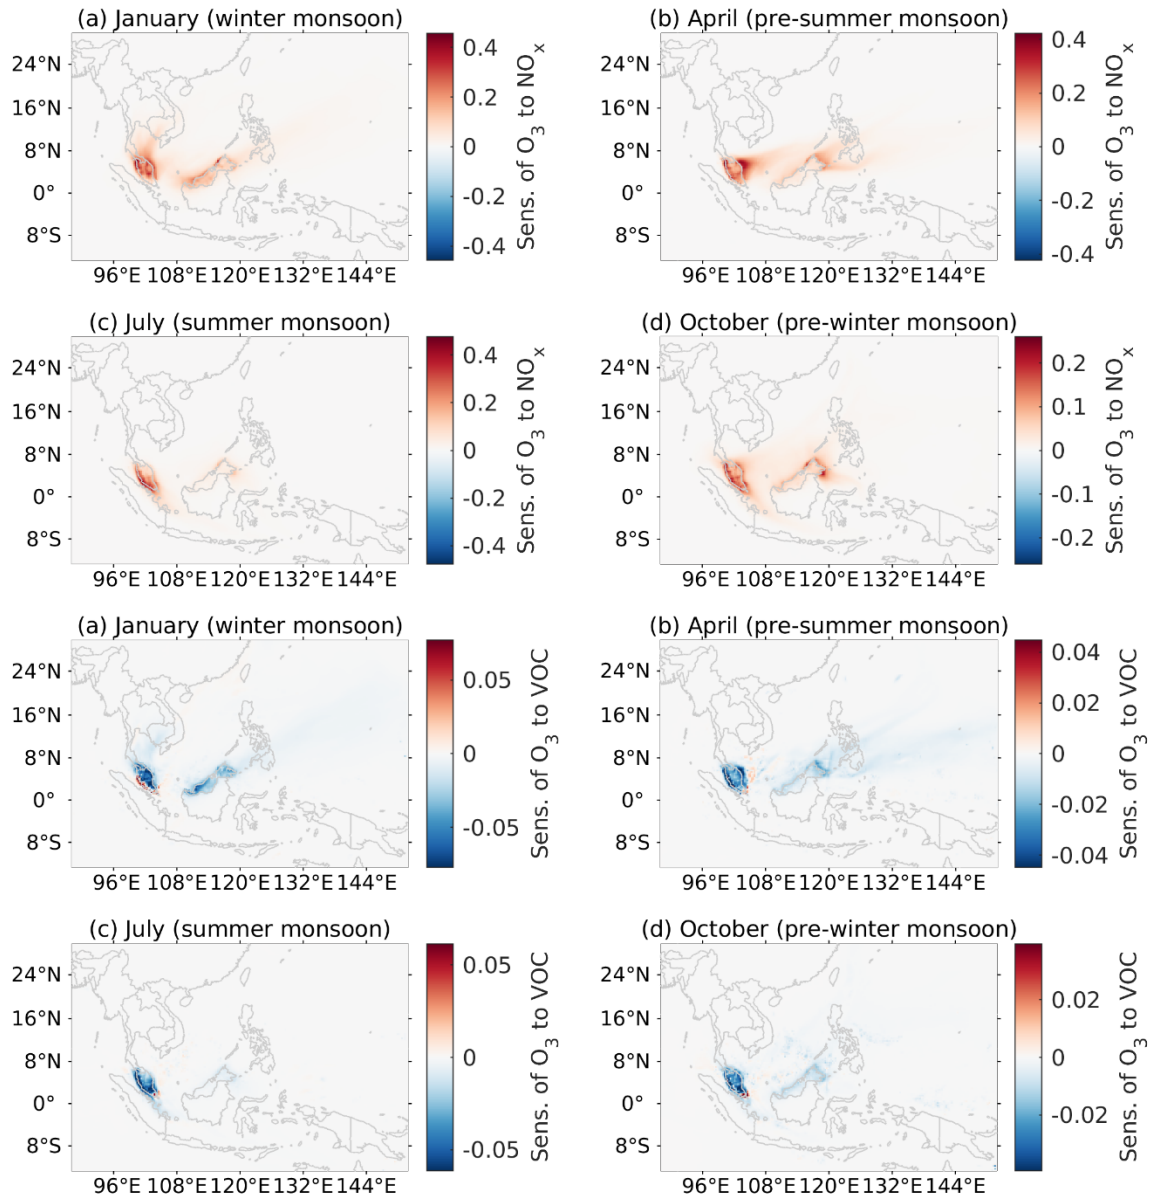

**Fig. S25.** Spatial distribution of the monthly mean sensitivity of  $O_3$  in Malaysia to  $NO_x$  and VOC emissions during the four monsoon seasons.

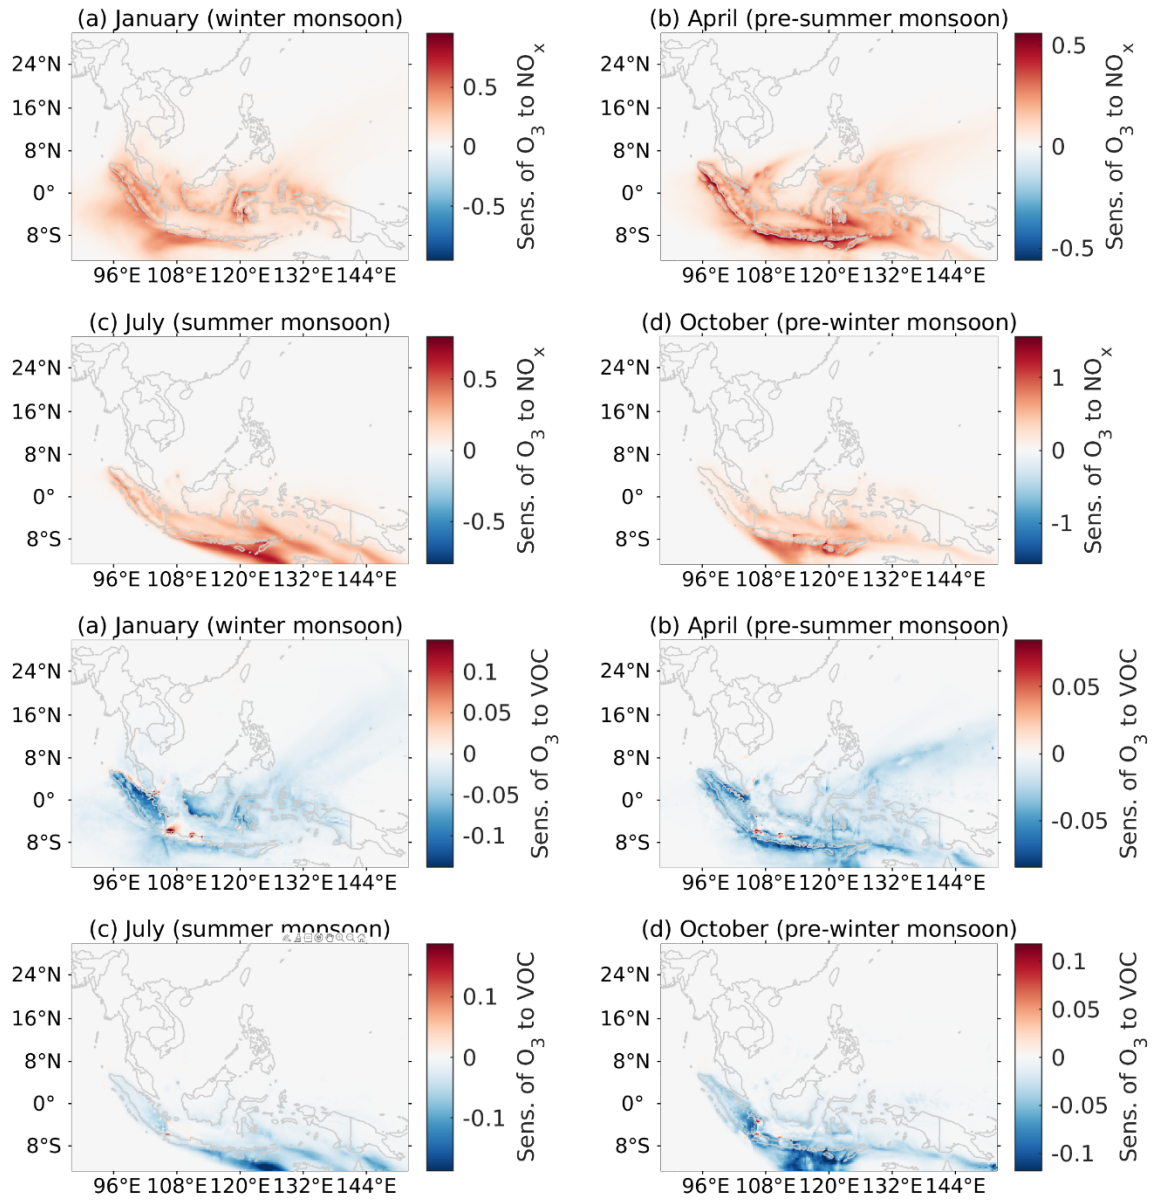

**Fig. S26.** Spatial distribution of the monthly mean sensitivity of  $O_3$  in Indonesia to  $NO_x$  and VOC emissions during the four monsoon seasons.

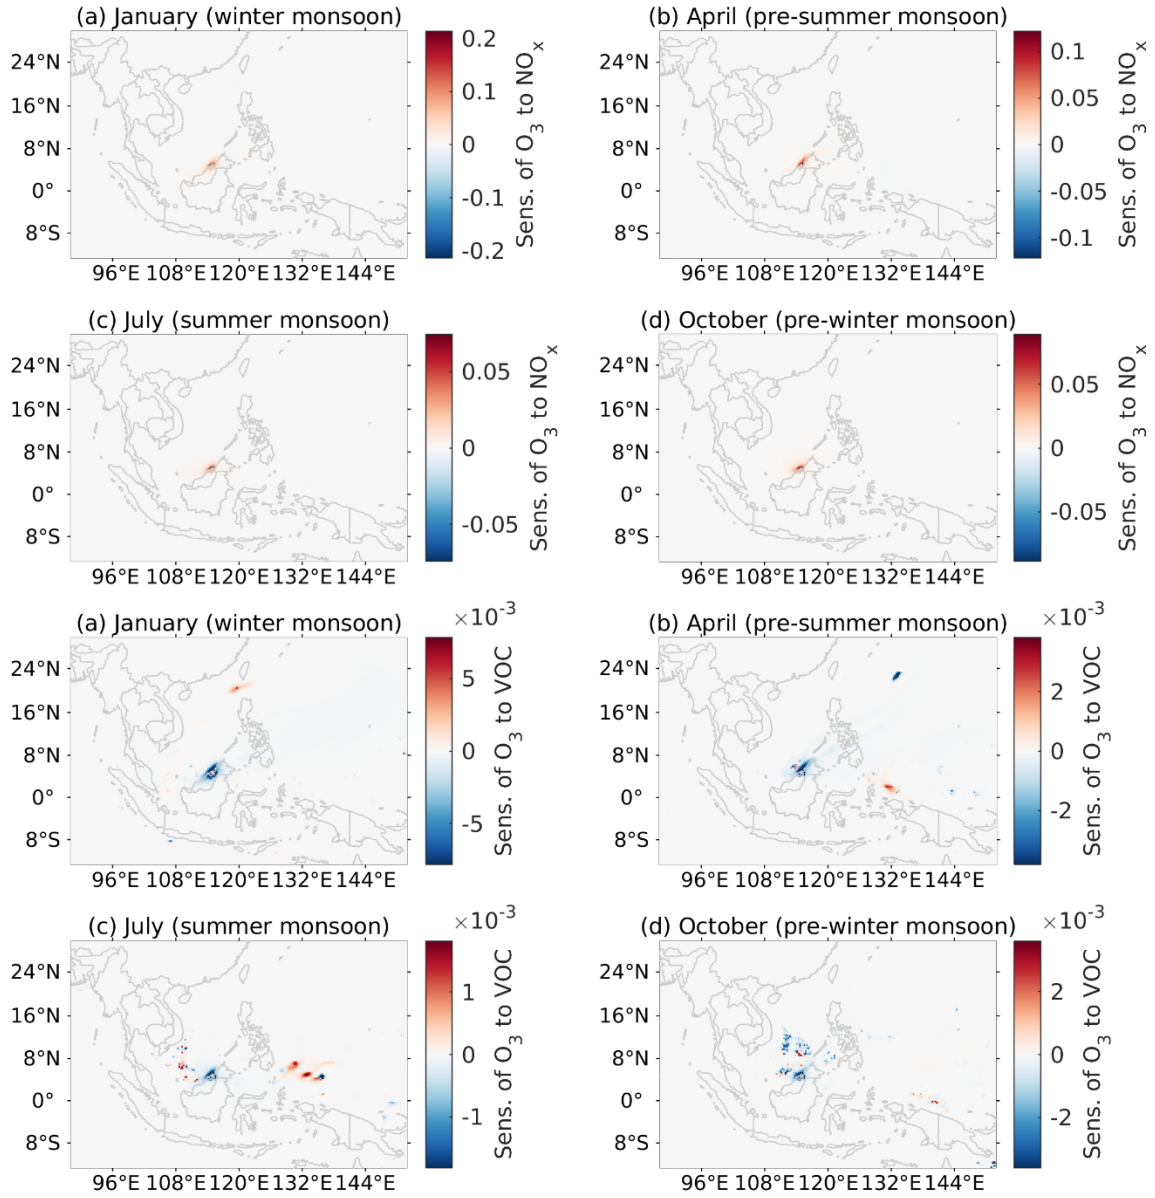

**Fig. S27.** Spatial distribution of the monthly mean sensitivity of  $O_3$  in Brunei to  $NO_x$  and VOC emissions during the four monsoon seasons.

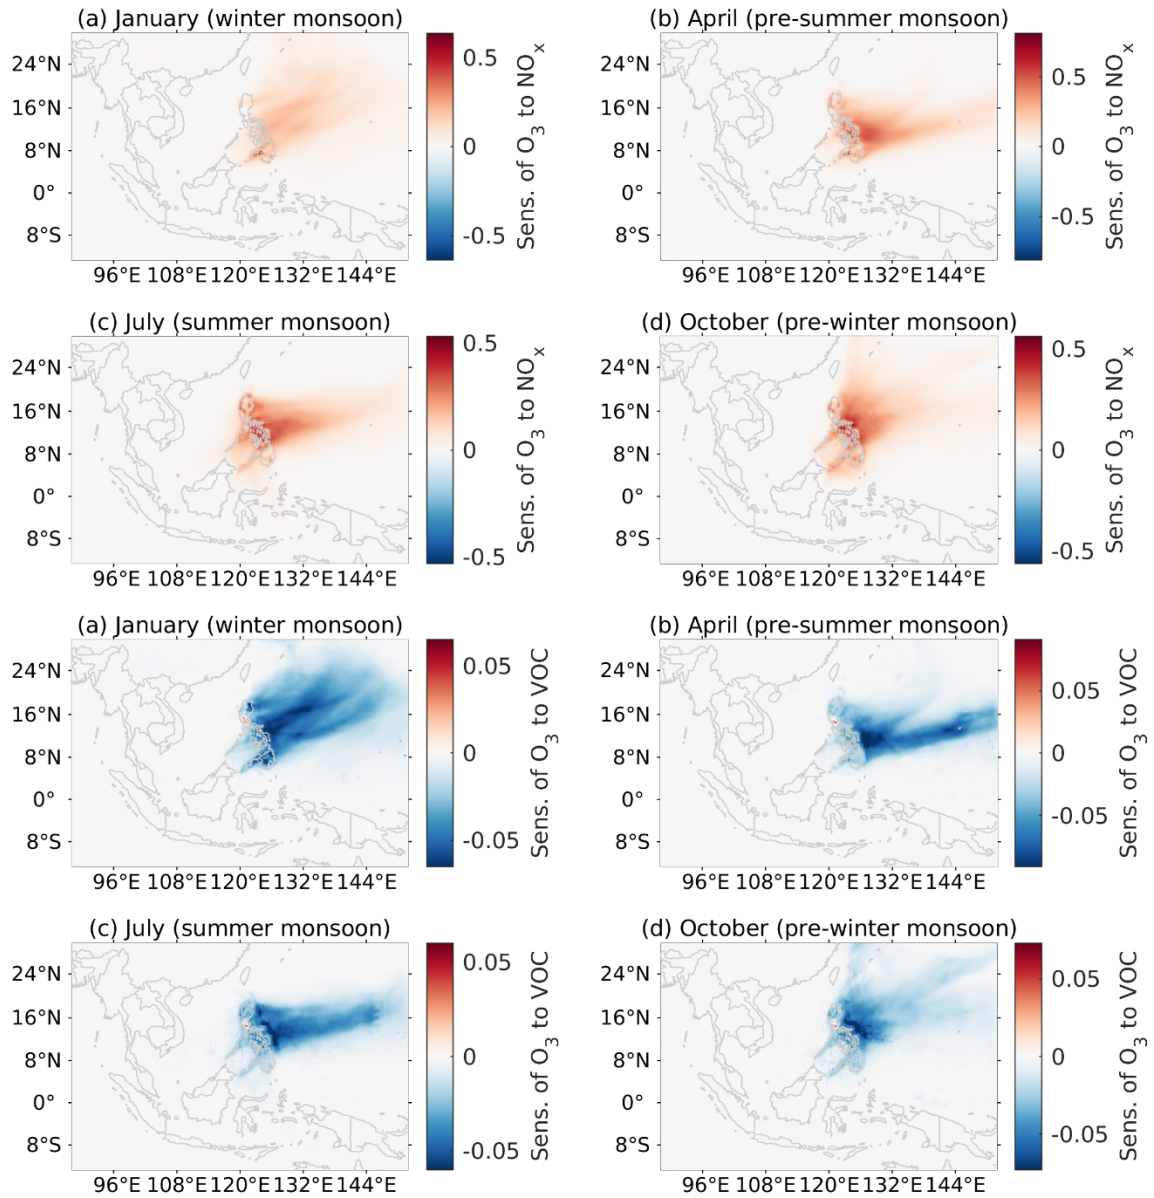

**Fig. S28.** Spatial distribution of the monthly mean sensitivity of  $O_3$  in the Philippines to  $NO_x$  and VOC emissions during the four monsoon seasons.

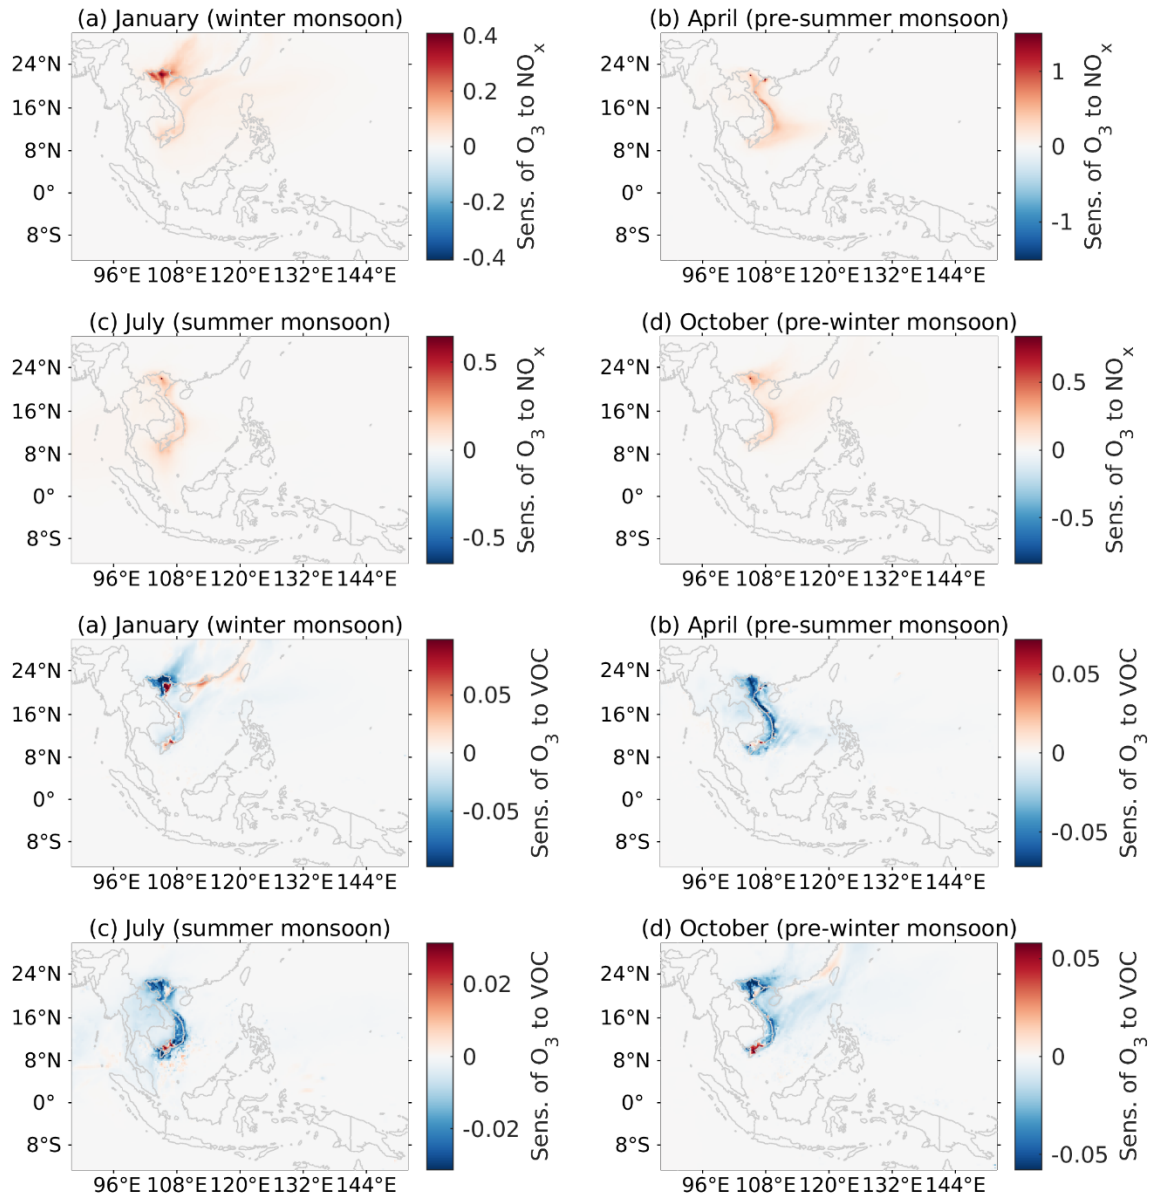

**Fig. S29.** Spatial distribution of the monthly mean sensitivity of  $O_3$  in Vietnam to  $NO_x$  and VOC emissions during the four monsoon seasons.

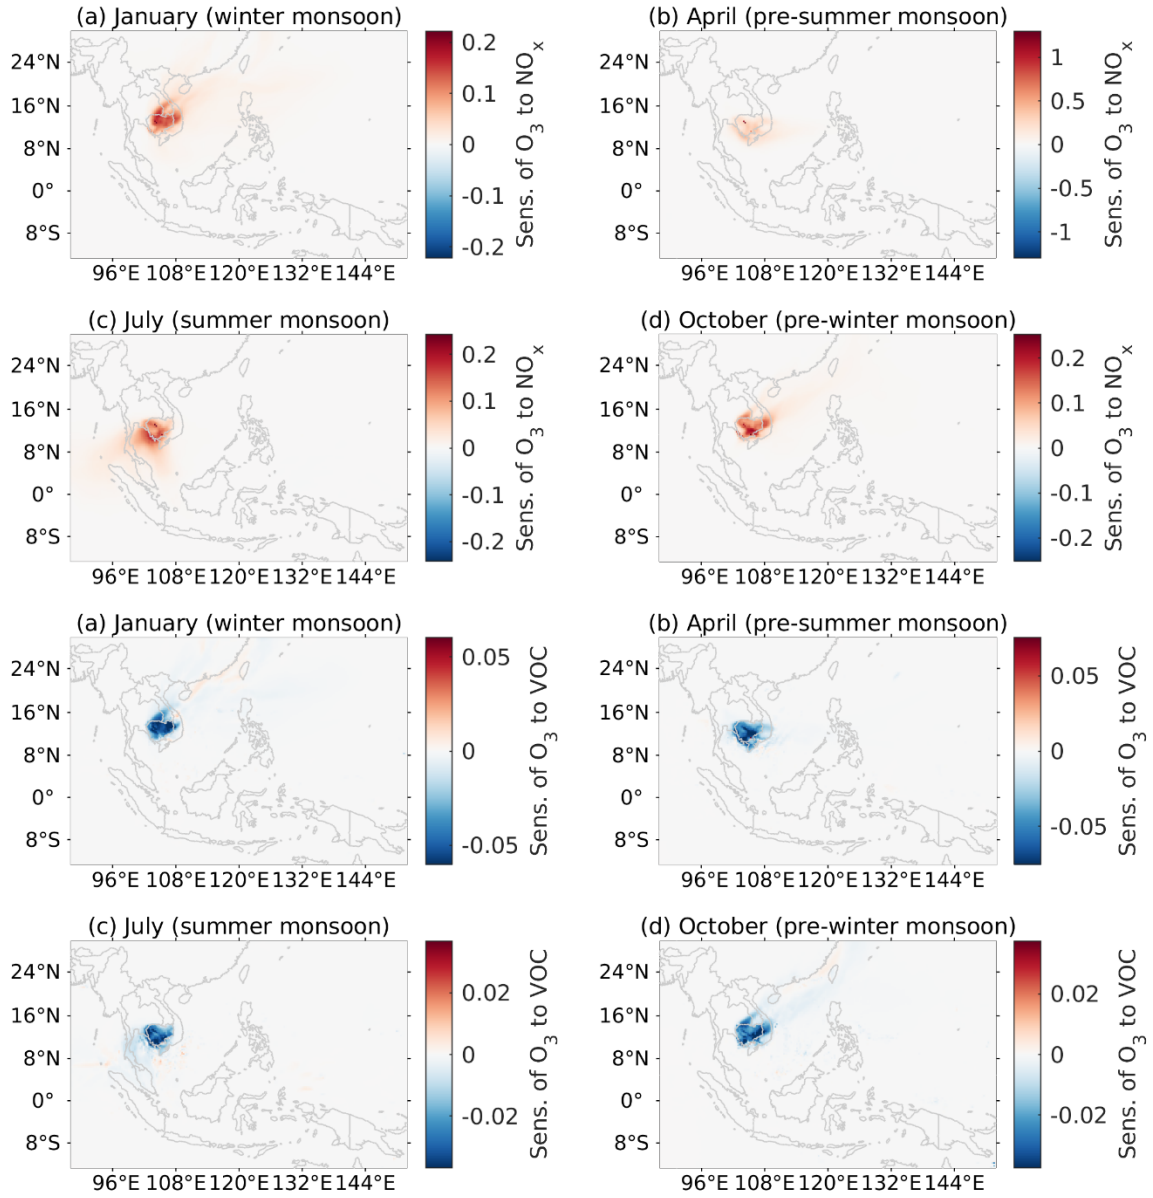

**Fig. S30.** Spatial distribution of the monthly mean sensitivity of  $O_3$  in Cambodia to  $NO_x$  and VOC emissions during the four monsoon seasons.

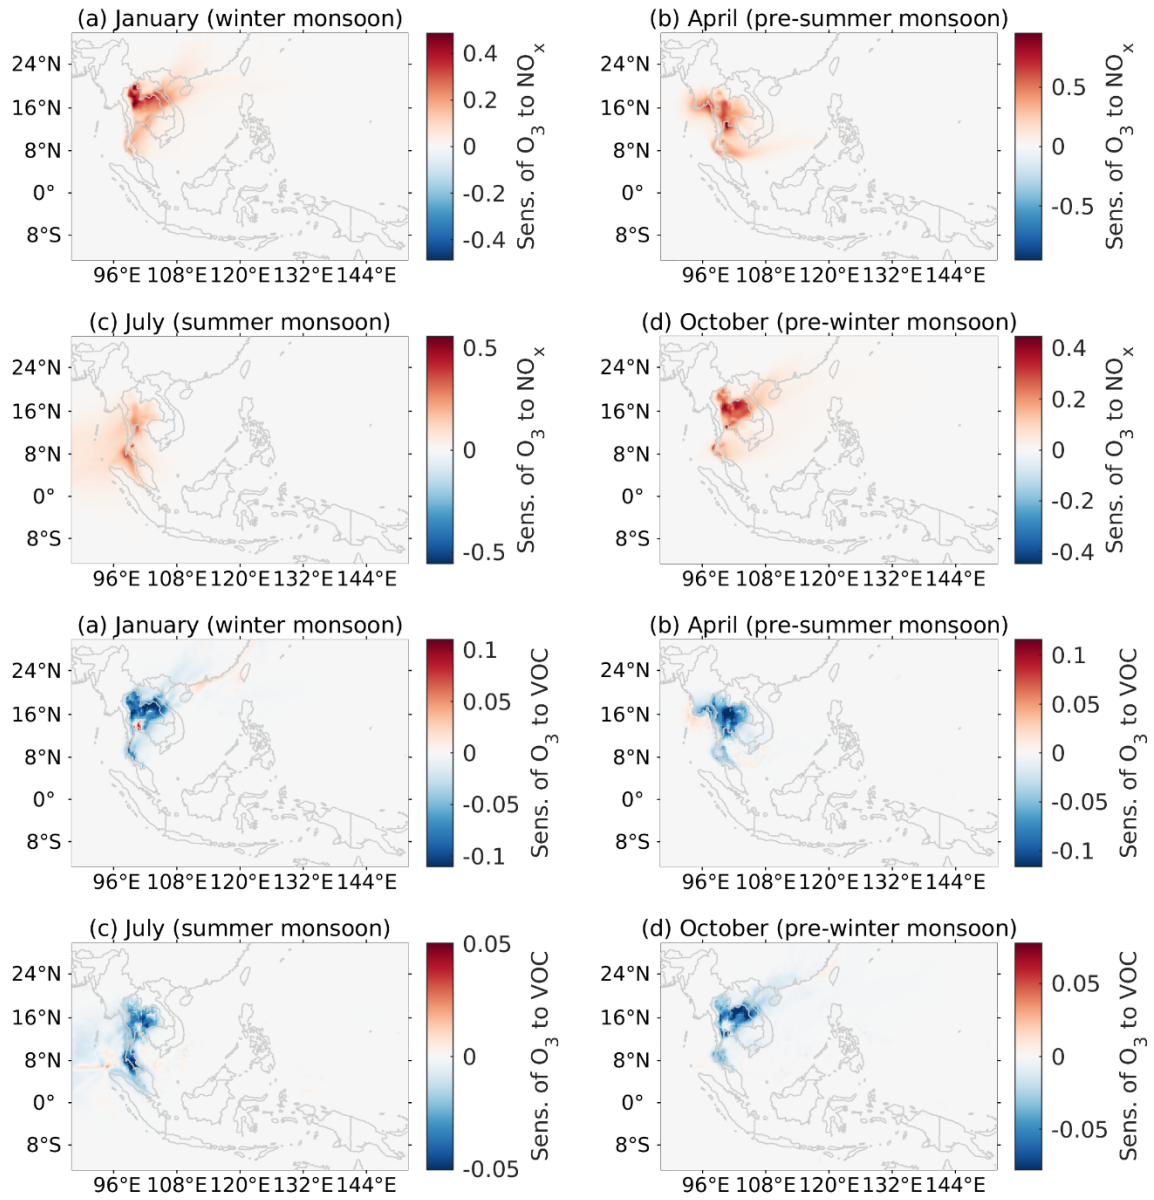

**Fig. S31.** Spatial distribution of the monthly mean sensitivity of  $O_3$  in Thailand to  $NO_x$  and VOC emissions during the four monsoon seasons.

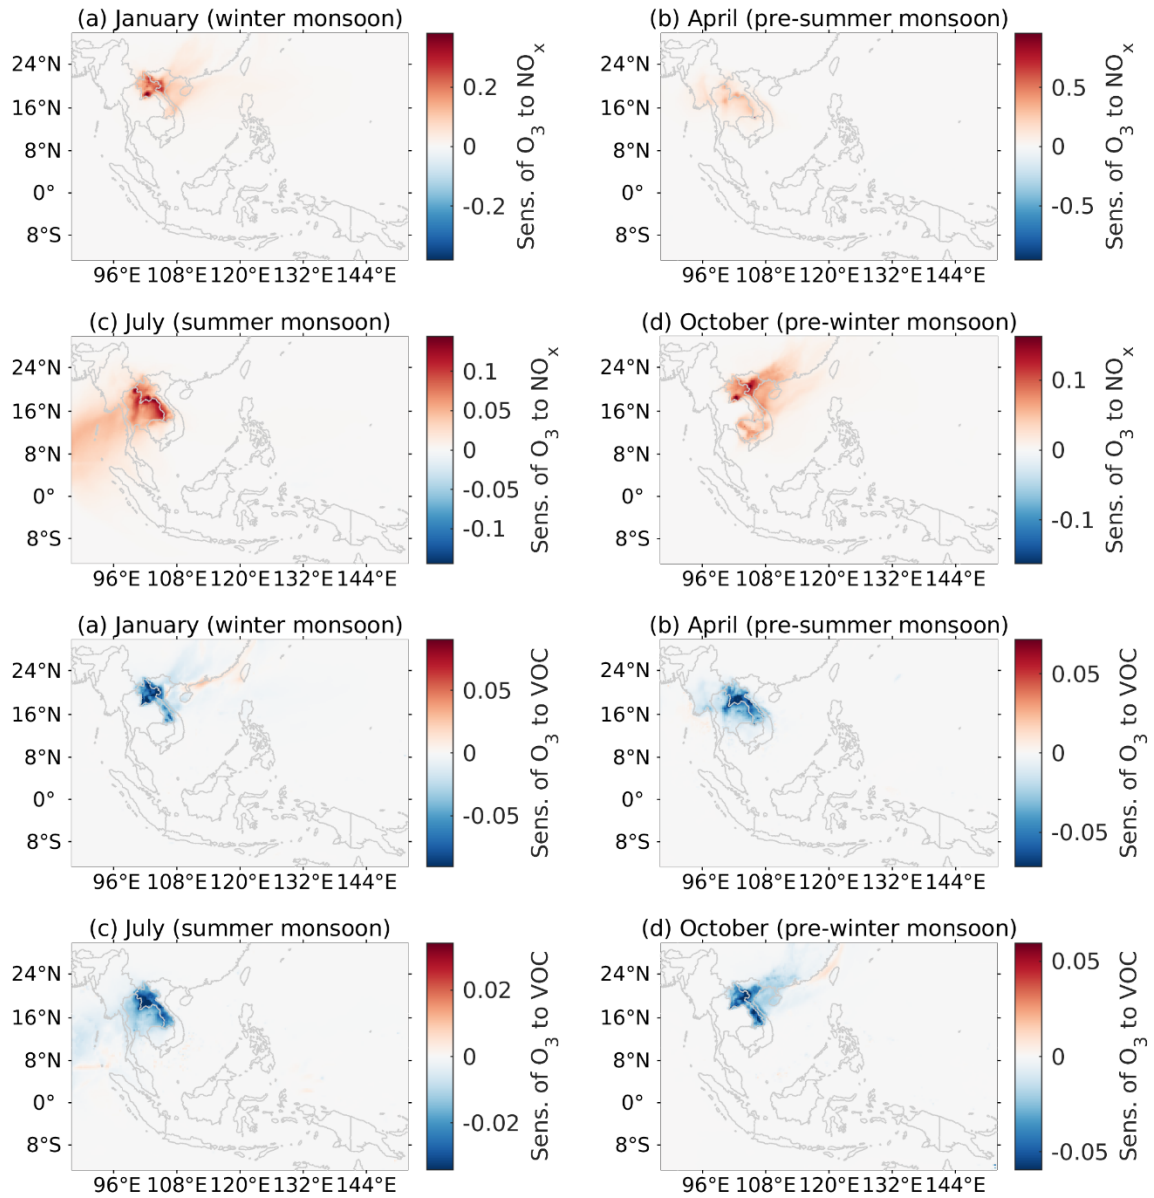

**Fig. S32.** Spatial distribution of the monthly mean sensitivity of O<sub>3</sub> in Laos to NO<sub>x</sub> and VOC emissions during the four monsoon seasons.

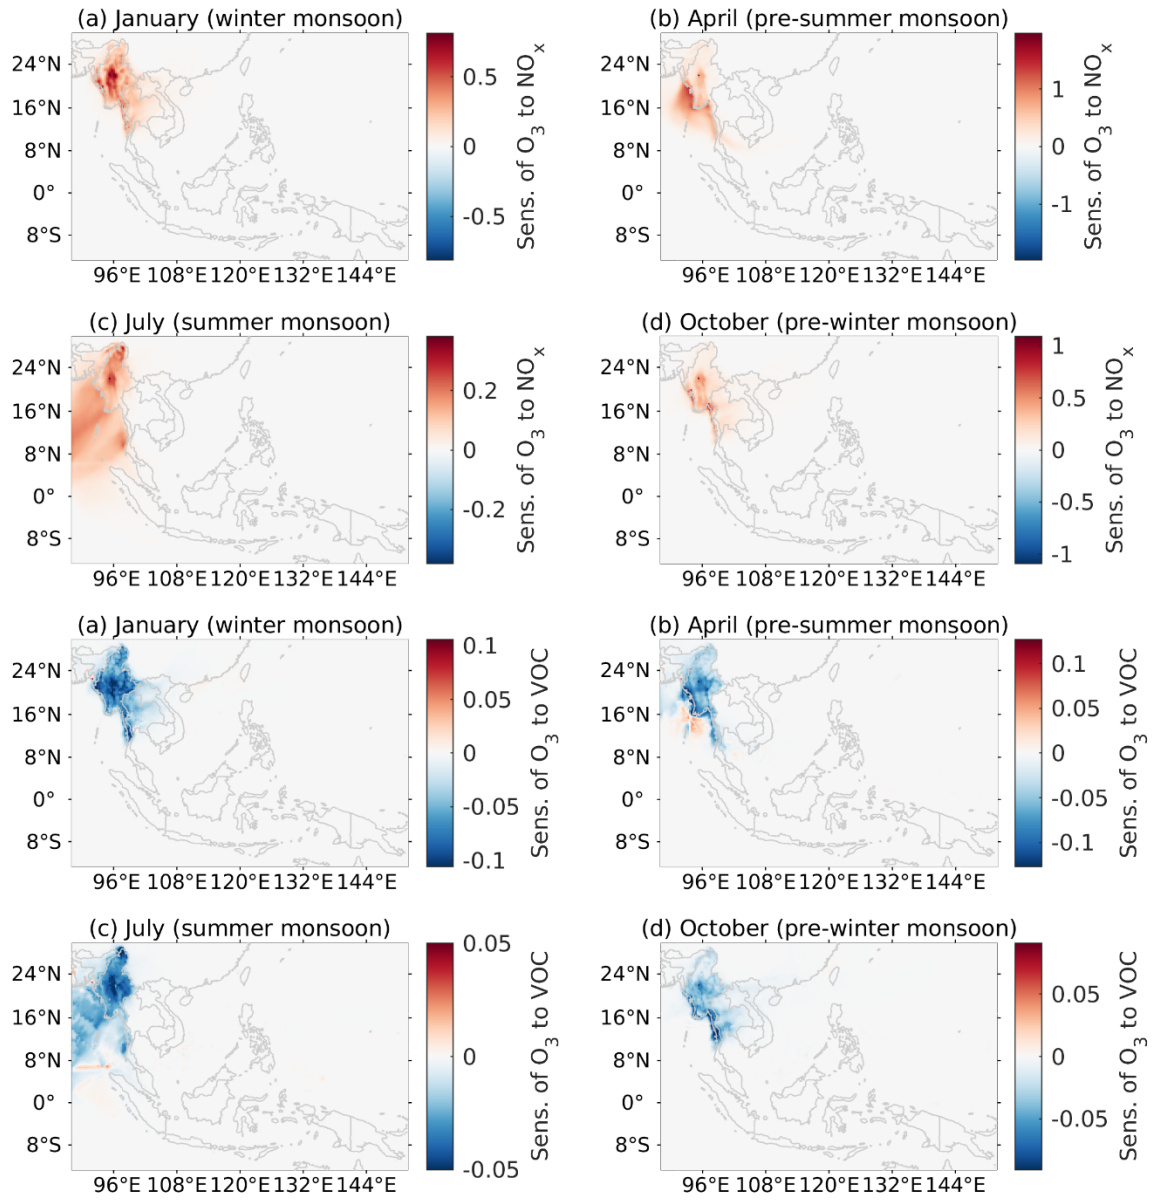

**Fig. S33.** Spatial distribution of the monthly mean sensitivity of  $O_3$  in Myanmar to  $NO_x$  and VOC emissions during the four monsoon seasons.

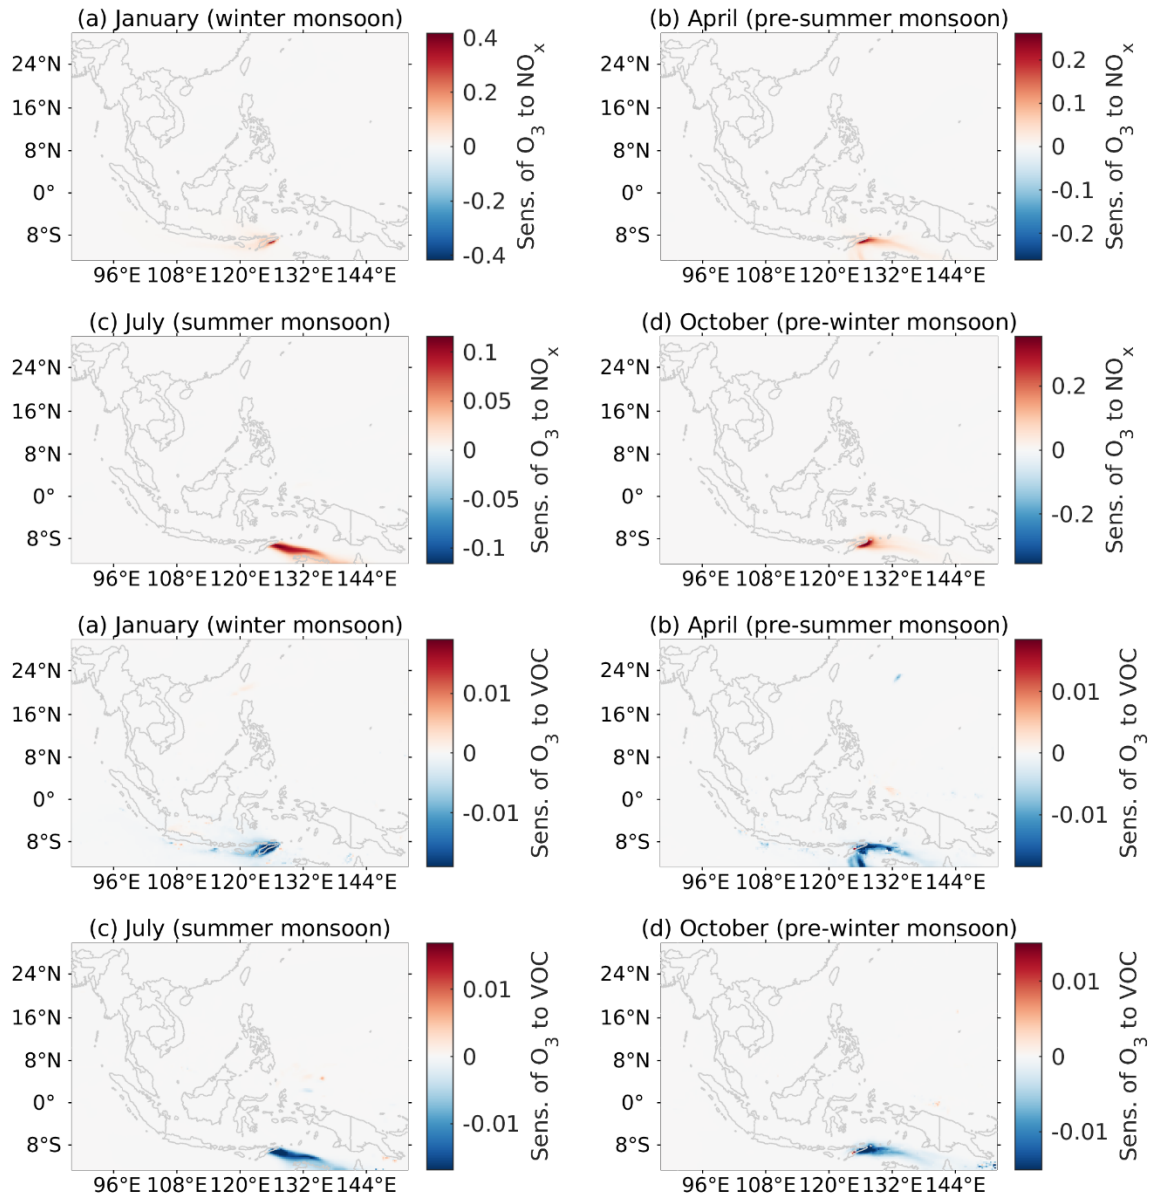

**Fig. S34.** Spatial distribution of the monthly mean sensitivity of  $O_3$  in East Timor to  $NO_x$  and VOC emissions during the four monsoon seasons.

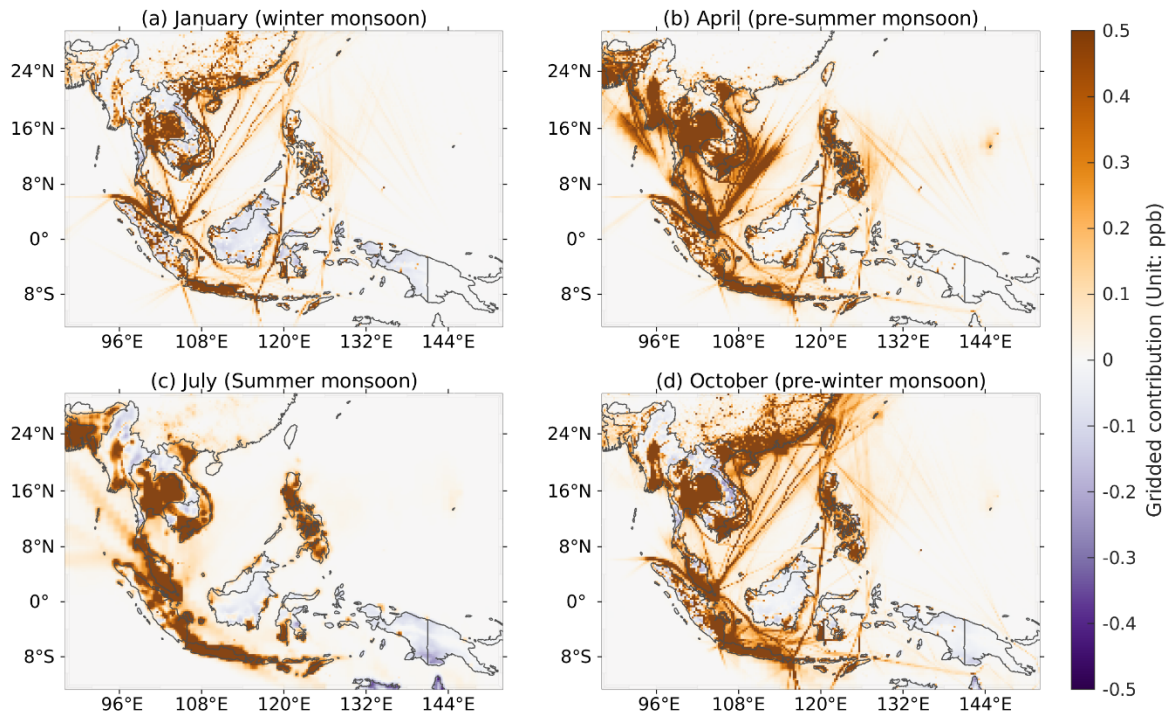

**Figure S35.** Grid-level contributions (unit: ppb) to the  $O_3$  levels in Southeast Asia among four monsoon seasons.

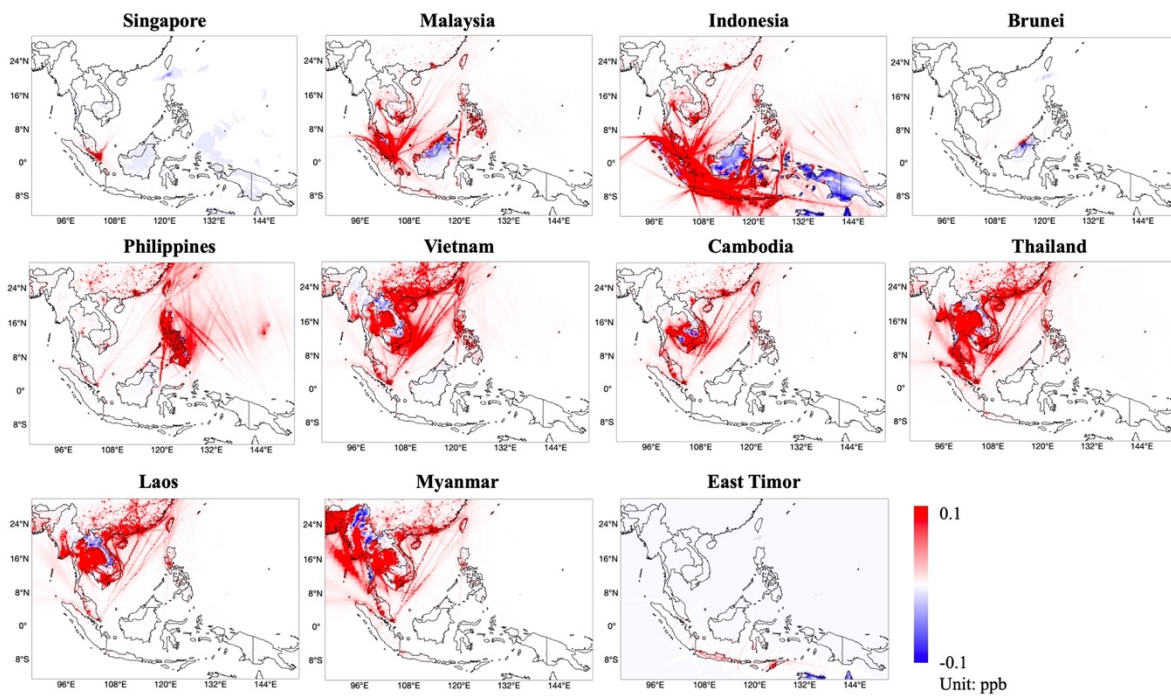

**Figure S36.** Grid-level contributions to the  $O_3$  levels in different countries in Southeast Asia.

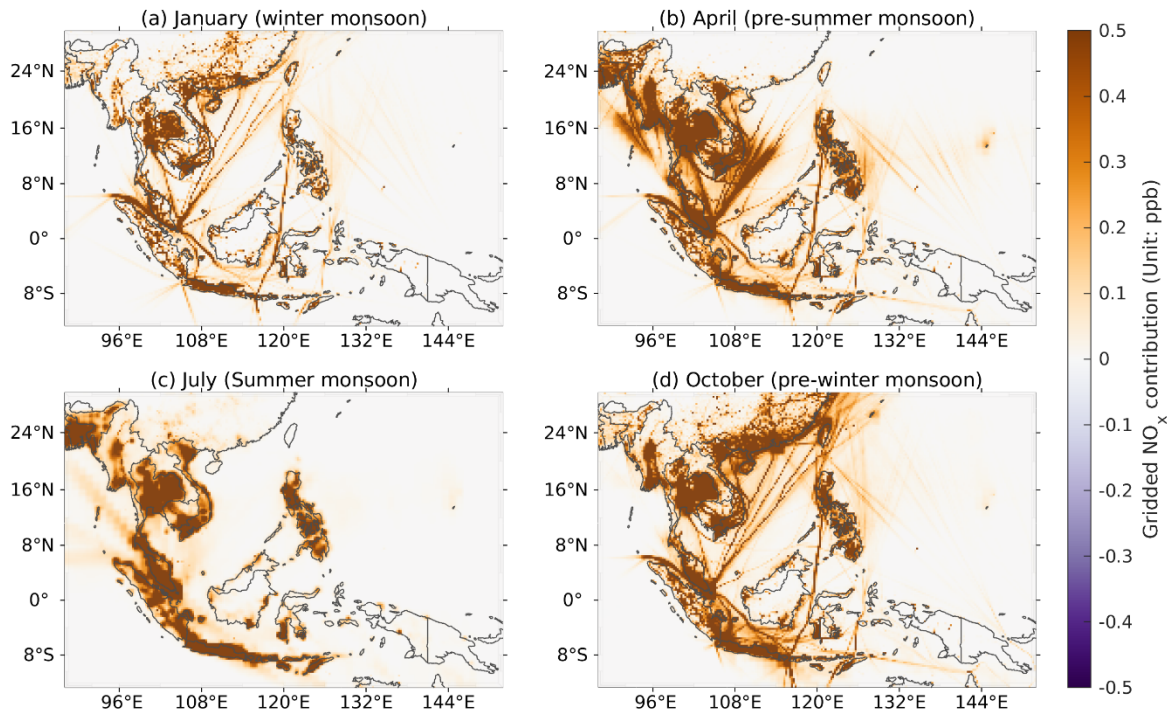

**Figure S37.** Grid-level  $\text{NO}_x$  contributions to the  $\text{O}_3$  levels in different countries in Southeast Asia.

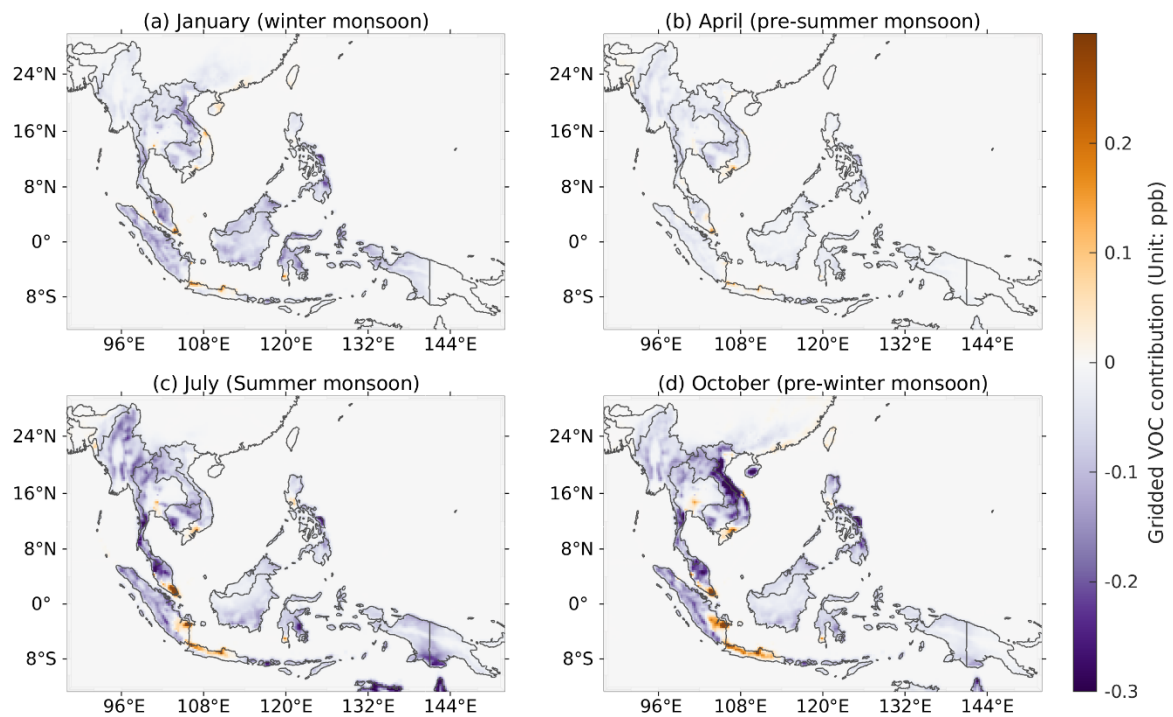

**Figure S38.** Grid-level VOC contributions to the  $\text{O}_3$  levels in different countries in Southeast Asia.

## Supplementary Tables

**Table S1.** Sensitivity test of MDA8 O<sub>3</sub> in January according to NO<sub>x</sub> and VOC perturbations.

|                              |          |                |                |
|------------------------------|----------|----------------|----------------|
| NO <sub>x</sub> perturbation | Original | -20% emissions | +20% emissions |
|                              | 33.2     | 32.7           | 33.7           |
| VOC perturbation             | Original | -30% emissions | +30% emissions |
|                              | 33.2     | 34.6           | 31.9           |

**Table S2.** VOC precursor emissions of CB05 in the CMAQ model.

| Abbreviation | Description                           | Abbreviation | Description                  |
|--------------|---------------------------------------|--------------|------------------------------|
| ALDX         | Aldehydes with 3 or more carbon atoms | OLE          | Terminal alkene acids        |
| BENZENE      | Benzene                               | PAR          | Carbon-carbon single bond    |
| ISOP         | Isoprene                              | TERP         | Monoterpenes                 |
| ETH          | Ethene                                | TOL          | Toluene and other mono alkyl |
| ETHA         | Ethane                                | XYL          | Xylene                       |
| ETOH         | Ethanol                               | ALD2         | Acetaldehyde                 |
| FORM         | Formaldehyde                          | MEOH         | Methanol                     |
| IOLE         | Internal alkene bond                  |              |                              |

**Table S3.** Evaluation of the CMAQ model simulation by comparing the O<sub>3</sub> concentration levels with the ground-level measurements from different stations. Data sources include the EANET and the AQI databases.

| Country           | Stations                    | NMB (%) |        |        |        | RMSE (ppb) |      |      |      |
|-------------------|-----------------------------|---------|--------|--------|--------|------------|------|------|------|
|                   |                             | Jan     | Apr    | Jul    | Oct    | Jan        | Apr  | Jul  | Oct  |
| Singapore (AQI)   | Singapore                   | 13.81   | 21.72  | 13.09  | 8.11   | 2.20       | 6.12 | 1.20 | 2.00 |
| Brunei (AQI)      | Muara                       | /       | /      | 0.65   | -1.48  | /          | /    | 0.98 | 2.07 |
|                   | Pekan-Tutong                | /       | /      | 8.35   | -3.91  | /          | /    | 0.81 | 1.52 |
| Philippines (AQI) | Biñan city                  | /       | /      | /      | 21.60  | /          | /    | /    | 2.93 |
| Vietnam (AQI)     | Hanoi                       | /       | /      | -1.22  | 24.08  | /          | /    | 2.65 | 7.71 |
|                   | Quảng-ninh_phuong nam       | /       | /      | 9.07   | /      | /          | /    | 5.05 | /    |
| Thailand          | Ayutthaya-witthayalai (AQI) | 33.21   | /      | /      | /      | 7.76       | /    | /    | /    |
|                   | Municipality office (AQI)   | 15.18   | 11.82  | /      | 11.59  | 1.91       | 1.40 | /    | 1.16 |
|                   | Bangkok (EANET)             | 9.14    | /      | 85.38  | 3.2    | 0.85       | /    | 0.81 | 0.78 |
|                   | Samutprakarn (EANET)        | 12.64   | /      | /      | 35.01  | 0.81       | /    | /    | 0.76 |
|                   | Kanchanaburi (EANET)        | /       | 12.83  | /      | /      | /          | 0.76 | /    | /    |
|                   | Chiang Mai (EANET)          | -21.07  | -42.23 | 35.46  | /      | 0.69       | 1.13 | 0.67 | /    |
|                   | Nai Mueang (EANET)          | /       | -12.08 | /      | /      | /          | 1.10 | /    | /    |
| Cambodia (EANET)  | Phnom Penh                  | /       | /      | /      | -2.87  | /          | /    | /    | 0.52 |
| Malaysia (AQI)    | balok-baru                  | /       | /      | -15.97 | -23.67 | /          | /    | 2.41 | 2.98 |
|                   | Bandaraya-melaka            | /       | /      | -9.86  | 10.90  | /          | /    | 2.78 | 3.48 |
|                   | Banting-selangor            | /       | /      | 0.93   | 14.01  | /          | /    | 2.51 | 3.30 |
|                   | Batu-muda                   | /       | /      | 11.05  | 24.24  | /          | /    | 2.97 | 4.49 |
|                   | Batu-pahat                  | /       | /      | -12.83 | 5.54   | /          | /    | 3.10 | 2.76 |
|                   | Jalan-tasek                 | /       | /      | -6.93  | -14.30 | /          | /    | 2.33 | 2.23 |
|                   | Kg. -air putih              | /       | /      | 25.85  | 5.10   | /          | /    | 4.64 | 2.89 |
|                   | Nilai                       | /       | /      | 1.34   | 15.38  | /          | /    | 2.44 | 3.63 |
|                   | Pelabuhan-kelang            | /       | /      | 11.53  | 21.92  | /          | /    | 3.22 | 4.02 |
|                   | Samalaju                    | /       | /      | -38.92 | -36.39 | /          | /    | 7.27 | 3.85 |
|                   | Segamat                     | /       | /      | -14.01 | -9.86  | /          | /    | 3.23 | 2.49 |
|                   | Seremban                    | /       | /      | 4.39   | 9.47   | /          | /    | 2.61 | 2.87 |
|                   | S-k Jalan Pegoh             | /       | /      | -5.21  | -3.11  | /          | /    | 2.35 | 2.28 |
|                   | Tangkak                     | /       | /      | -15.22 | -0.52  | /          | /    | 3.17 | 2.54 |

**Table S4.** The quantitative measurements of NMB, R, and IoA between our CMAQ simulation and the CAMS EAC4 reanalysis data over various Southeast Asian countries in 2019. MYS: Malaysia, IDN: Indonesia, BRN: Brunei, PHL: Philippines, VNM: Vietnam, KHM: Cambodia, THA: Thailand, LAO: Laos, MMR: Myanmar.

|     |         | MYS   | IDN    | BRN    | PHL   | VNM   | KHM    | THA   | LAO    | MMR    |
|-----|---------|-------|--------|--------|-------|-------|--------|-------|--------|--------|
| NMB | January | 11.32 | 29.46  | 3.46   | 7.89  | -1.08 | -27.24 | -9.41 | -1.54  | -30.73 |
|     | April   | 2.34  | 24.69  | -16.90 | -4.29 | 12.17 | 15.22  | 22.08 | -10.14 | -12.03 |
|     | July    | -3.26 | -10.94 | -14.65 | 4.94  | 22.34 | 20.85  | 40.12 | 41.27  | 54.90  |
|     | October | 4.67  | -23.50 | 12.68  | -6.00 | -4.23 | -18.46 | 4.33  | -3.77  | 0.52   |
| R   | January | 0.81  | 0.79   | 0.89   | 0.69  | 0.61  | 0.19   | 0.63  | 0.87   | 0.64   |
|     | April   | 0.81  | 0.82   | 0.81   | 0.61  | 0.24  | 0.33   | 0.42  | 0.18   | 0.43   |
|     | July    | 0.91  | 0.83   | 0.91   | 0.45  | 0.55  | 0.61   | 0.51  | 0.09   | 0.61   |
|     | October | 0.89  | 0.69   | 0.91   | 0.62  | 0.52  | 0.71   | 0.34  | 0.79   | 0.73   |
| IoA | January | 0.88  | 0.75   | 0.94   | 0.72  | 0.78  | 0.42   | 0.75  | 0.93   | 0.69   |
|     | April   | 0.90  | 0.81   | 0.79   | 0.68  | 0.48  | 0.54   | 0.55  | 0.53   | 0.55   |
|     | July    | 0.95  | 0.88   | 0.86   | 0.66  | 0.64  | 0.54   | 0.52  | 0.31   | 0.45   |
|     | October | 0.94  | 0.76   | 0.87   | 0.73  | 0.73  | 0.69   | 0.60  | 0.83   | 0.84   |

**Table S5.** The country-level MDA8 O<sub>3</sub> level (ppb) during the four monsoon seasons.

| Country     | Winter monsoon | Pre-summer monsoon | Summer monsoon | Pre-winter monsoon |
|-------------|----------------|--------------------|----------------|--------------------|
| Singapore   | 79.7           | 79.3               | 42.1           | 48.5               |
| Malaysia    | 35.1           | 28.0               | 26.3           | 27.1               |
| Indonesia   | 31.9           | 26.0               | 25.0           | 23.1               |
| Brunei      | 26.1           | 20.8               | 15.1           | 19.4               |
| Philippines | 41.0           | 30.6               | 28.0           | 29.2               |
| Vietnam     | 41.8           | 45.4               | 35.9           | 43.8               |
| Cambodia    | 34.9           | 40.8               | 31.1           | 34.1               |
| Thailand    | 39.2           | 45.6               | 36.0           | 41.4               |
| Laos        | 33.0           | 36.2               | 30.8           | 33.3               |
| Myanmar     | 23.4           | 36.4               | 32.9           | 27.8               |
| East Timor  | 38.4           | 28.2               | 28.8           | 19.7               |

**Table S6.** Averaged height (m) of each layer in the model simulation.

|              |           |           |           |           |
|--------------|-----------|-----------|-----------|-----------|
| <b>Layer</b> | <b>1</b>  | <b>2</b>  | <b>3</b>  | <b>4</b>  |
| Height (m)   | 25        | 37        | 59        | 82        |
| <b>Layer</b> | <b>5</b>  | <b>6</b>  | <b>7</b>  | <b>8</b>  |
| Height (m)   | 106       | 133       | 165       | 202       |
| <b>Layer</b> | <b>9</b>  | <b>10</b> | <b>11</b> | <b>12</b> |
| Height (m)   | 247       | 301       | 365       | 442       |
| <b>Layer</b> | <b>13</b> | <b>14</b> | <b>15</b> | <b>16</b> |
| Height (m)   | 532       | 641       | 770       | 923       |
| <b>Layer</b> | <b>17</b> | <b>18</b> | <b>19</b> | <b>20</b> |
| Height (m)   | 1107      | 1325      | 1585      | 1896      |
| <b>Layer</b> | <b>21</b> | <b>22</b> | <b>23</b> | <b>24</b> |
| Height (m)   | 2634      | 3559      | 5406      | 9050      |
| <b>Layer</b> | <b>25</b> | <b>26</b> |           |           |
| Height (m)   | 14412     | 19584     |           |           |

**Table S7.** NO<sub>x</sub> and VOC emissions from different sectors in the typical VOC-limited regions, including Singapore, Jakarta, Manila, Bangkok, Ho Chi Minh City, Hanoi, and Kuala Lumpur. TRA: transportation, SHP: shipping, IND: industry, RES: residential, FIR: fire, ENE: energy, REF: refinery, SLV: solvent, AGR: agriculture, BIO: biogenic emissions, SUM: summary of all emission sectors.

| NO <sub>x</sub><br>(mol/s) | Singapore | Jakarta | Manila | Bangkok | Ho Chi<br>Minh City | Hanoi | Kuala<br>Lumpur |
|----------------------------|-----------|---------|--------|---------|---------------------|-------|-----------------|
| TRA                        | 20.54     | 16.18   | 4.86   | 30.45   | 0.64                | 0.65  | 32.12           |
| SHP                        | 5.81      | 0.00    | 0.00   | 0.10    | 1.85                | 0.00  | 0.00            |
| IND                        | 12.24     | 5.82    | 6.48   | 9.23    | 0.26                | 0.13  | 4.90            |
| RES                        | 0.72      | 0.52    | 0.34   | 0.46    | 0.06                | 0.08  | 0.42            |
| FIR                        | 0.00      | 0.36    | 0.14   | 0.06    | 0.21                | 0.15  | 0.01            |
| ENE                        | 0.00      | 0.00    | 0.00   | 0.00    | 0.00                | 0.00  | 0.00            |
| REF                        | 0.19      | 0.04    | 0.01   | 0.32    | 0.00                | 0.00  | 0.02            |
| SLV                        | 0.00      | 0.00    | 0.00   | 0.00    | 0.00                | 0.00  | 0.00            |
| AGR                        | 0.23      | 0.21    | 0.15   | 0.04    | 0.06                | 0.07  | 0.11            |
| BIO                        | 0.00      | 0.00    | 0.00   | 0.00    | 0.00                | 0.00  | 0.00            |
| SUM                        | 39.74     | 23.12   | 11.98  | 40.66   | 3.09                | 1.07  | 37.58           |
| VOC<br>(mol/s)             | Singapore | Jakarta | Manila | Bangkok | Ho Chi<br>Minh City | Hanoi | Kuala<br>Lumpur |
| TRA                        | 12.07     | 31.52   | 5.48   | 32.25   | 0.72                | 0.68  | 52.26           |
| SHP                        | 0.09      | 0.00    | 0.00   | 0.00    | 0.02                | 0.00  | 0.00            |
| IND                        | 7.73      | 3.72    | 2.74   | 13.53   | 0.09                | 0.07  | 3.80            |
| RES                        | 0.26      | 0.42    | 0.18   | 0.11    | 0.62                | 0.84  | 0.22            |
| FIR                        | 0.00      | 2.44    | 0.97   | 0.39    | 1.38                | 0.98  | 0.08            |
| ENE                        | 0.00      | 0.00    | 0.00   | 0.00    | 0.00                | 0.00  | 0.00            |
| REF                        | 0.92      | 4.29    | 18.62  | 96.62   | 0.10                | 0.11  | 9.73            |
| SLV                        | 31.13     | 15.97   | 17.61  | 17.38   | 0.18                | 0.21  | 27.62           |
| AGR                        | 1.48      | 0.61    | 0.73   | 1.72    | 0.00                | 0.00  | 2.33            |
| BIO                        | 22.50     | 15.12   | 22.75  | 13.56   | 26.99               | 22.64 | 53.36           |
| SUM                        | 76.19     | 74.09   | 69.08  | 175.57  | 30.11               | 25.54 | 149.39          |

**Table S8.** The contributions from the super-regional sources to the surface O<sub>3</sub> and the related premature mortality in Southeast Asia. For super-regional sources, we detailed the contributions from the super-regional emission transport and boundary conditions.

| O <sub>3</sub><br>contribution (ppb) | Super-regional sources |                        |                          |
|--------------------------------------|------------------------|------------------------|--------------------------|
|                                      | Total                  | Boundary<br>conditions | Super-regional emissions |
| Singapore                            | 6.07                   | 0.80                   | 5.27                     |
| Malaysia                             | 5.79                   | 0.64                   | 5.15                     |
| Indonesia                            | 8.75                   | 3.81                   | 4.94                     |
| Brunei                               | 4.80                   | 0.38                   | 4.42                     |
| Philippines                          | 13.68                  | 2.79                   | 10.89                    |
| Vietnam                              | 12.48                  | 3.47                   | 9.00                     |
| Cambodia                             | 8.61                   | 2.37                   | 6.24                     |
| Thailand                             | 10.73                  | 3.99                   | 6.74                     |
| Laos                                 | 12.28                  | 4.60                   | 7.68                     |
| Myanmar                              | 14.93                  | 10.01                  | 4.93                     |
| East Timor                           | 18.18                  | 14.73                  | 3.45                     |

**Table S9.** NO<sub>x</sub> and VOC emissions from different sectors in the typical NO<sub>x</sub>-limited regions, including rural Malaysia, rural Indonesia, Mountainous Southeast Asia, and East Timor. TRA: transportation, SHP: shipping, IND: industry, RES: residential, FIR: fire, ENE: energy, REF: refinery, SLV: solvent, AGR: agriculture, BIO: biogenic emissions, SUM: summary of all emission sectors.

| NO <sub>x</sub> (mol/s) | Rural Malaysia | Rural Indonesia | Mountainous<br>Southeast Asia | East Timor |
|-------------------------|----------------|-----------------|-------------------------------|------------|
| TRA                     | 0.41           | 0.14            | 0.27                          | 0.11       |
| SHP                     | 0.22           | 0.02            | 0.02                          | 0.00       |
| IND                     | 0.04           | 0.04            | 0.10                          | 0.01       |
| RES                     | 0.01           | 0.02            | 0.03                          | 0.01       |
| FIR                     | 0.01           | 0.04            | 0.07                          | 0.02       |
| ENE                     | 0.00           | 0.00            | 0.00                          | 0.00       |
| REF                     | 0.00           | 0.00            | 0.00                          | 0.00       |
| SLV                     | 0.00           | 0.00            | 0.00                          | 0.00       |
| AGR                     | 0.02           | 0.02            | 0.03                          | 0.02       |
| BIO                     | 0.00           | 0.00            | 0.00                          | 0.00       |
| SUM                     | 0.72           | 0.29            | 0.53                          | 0.16       |
| VOC<br>(mol/s)          | Malaysia       | Indonesia       | Mountainous<br>Southeast Asia | East Timor |
| TRA                     | 0.35           | 0.18            | 0.22                          | 0.17       |
| SHP                     | 0.00           | 0.00            | 0.00                          | 0.00       |
| IND                     | 0.03           | 0.03            | 0.07                          | 0.01       |
| RES                     | 0.05           | 0.30            | 0.28                          | 0.10       |
| FIR                     | 0.06           | 0.27            | 0.45                          | 0.10       |
| ENE                     | 0.00           | 0.00            | 0.00                          | 0.00       |
| REF                     | 0.10           | 0.03            | 0.32                          | 0.01       |
| SLV                     | 0.29           | 0.20            | 0.20                          | 0.06       |
| AGR                     | 0.02           | 0.00            | 0.01                          | 0.00       |
| BIO                     | 51.19          | 33.53           | 29.67                         | 13.48      |
| SUM                     | 52.08          | 34.55           | 31.22                         | 13.93      |

## Reference

Jin, X., Fiore, A. M., Murray, L. T., Valin, L. C., Lamsal, L. N., Duncan, B., ... & Tonnesen, G. S. (2017). Evaluating a space-based indicator of surface ozone-NO<sub>x</sub>-VOC sensitivity over midlatitude source regions and application to decadal trends. *Journal of Geophysical Research: Atmospheres*, 122(19), 10-439.
